# Supplementary material for: Social, health and economic impact of COVID-19: Healthy Ageing In Scotland (HAGIS) – a protocol for a mixed-methods study
Source: PubMed Central journal article supplement (PMC9933129; doi:10.1136/bmjopen-2022-061427), 2023-02-15

# BMJ Open

BMJ Open is committed to open peer review. As part of this commitment we make the peer review history of every article we publish publicly available.

When an article is published we post the peer reviewers' comments and the authors' responses online. We also post the versions of the paper that were used during peer review. These are the versions that the peer review comments apply to.

The versions of the paper that follow are the versions that were submitted during the peer review process. They are not the versions of record or the final published versions. They should not be cited or distributed as the published version of this manuscript.

BMJ Open is an open access journal and the full, final, typeset and author-corrected version of record of the manuscript is available on our site with no access controls, subscription charges or pay-per-view fees (<http://bmjopen.bmj.com>).

If you have any questions on BMJ Open's open peer review process please email [info.bmjopen@bmj.com](mailto:info.bmjopen@bmj.com)

# BMJ Open

## The social, health and economic impact of COVID-19 – Healthy Ageing In Scotland (HAGIS): a protocol for a mixed- methods study

|                               |                                                                                                                                                                                                                                                                                                                                                                                                                                                                     |
|-------------------------------|---------------------------------------------------------------------------------------------------------------------------------------------------------------------------------------------------------------------------------------------------------------------------------------------------------------------------------------------------------------------------------------------------------------------------------------------------------------------|
| Journal:                      | <i>BMJ Open</i>                                                                                                                                                                                                                                                                                                                                                                                                                                                     |
| Manuscript ID                 | bmjopen-2022-061427                                                                                                                                                                                                                                                                                                                                                                                                                                                 |
| Article Type:                 | Protocol                                                                                                                                                                                                                                                                                                                                                                                                                                                            |
| Date Submitted by the Author: | 24-Jan-2022                                                                                                                                                                                                                                                                                                                                                                                                                                                         |
| Complete List of Authors:     | Arakelyan, Stella; University of Stirling<br>Brown, Tamara; University of Stirling<br>McCabe, Louise; University of Stirling<br>McGregor, Lesley ; University of Stirling,<br>Comerford, David; University of Stirling,<br>Dawson, Alison; University of Stirling,<br>Bell, David; University of Stirling, Division of Economics<br>Douglas, Cristina; University of Stirling,<br>Houston, John; University of Stirling,<br>Douglas, Elaine; University of Stirling |
| Keywords:                     | COVID-19, PUBLIC HEALTH, MENTAL HEALTH                                                                                                                                                                                                                                                                                                                                                                                                                              |
|                               |                                                                                                                                                                                                                                                                                                                                                                                                                                                                     |

SCHOLARONE™  
Manuscripts

1  
2  
3 **Title:** The social, health and economic impact of COVID-19 – Healthy Ageing In Scotland  
4  
5 (HAGIS): a protocol for a mixed-methods study  
6  
7  
8

9 **Authors:** Stella Arakelyan<sup>1</sup>, Tamara Brown<sup>1</sup>, Louise McCabe<sup>1</sup>, Lesley McGregor<sup>2</sup>, David  
10  
11 Comerford<sup>3</sup>, Alison Dawson<sup>1</sup>, David Bell<sup>3</sup>, Cristina Douglas<sup>1</sup>, John Houston<sup>3</sup>, Elaine Douglas<sup>1</sup>  
12  
13  
14

15  
16 <sup>1</sup>Centre for Environment, Dementia and Ageing Research (CEDAR), Faculty of Social  
17  
18 Sciences, University of Stirling, Stirling, FK9 4LA, Scotland, United Kingdom.  
19

20  
21 <sup>2</sup>Division of Psychology, Faculty of Natural Sciences, University of Stirling, Stirling, FK9 4LA,  
22  
23 Scotland, United Kingdom  
24

25  
26  
27 <sup>3</sup>Stirling Management School, University of Stirling, Stirling, FK9 4LA, Scotland, United  
28  
29 Kingdom.  
30

31  
32  
33  
34 **\*Corresponding author:** Dr Elaine Douglas; Email: [elaine.douglas@stir.ac.uk](mailto:elaine.douglas@stir.ac.uk); Centre for  
35  
36 Environment, Dementia and Ageing Research (CEDAR), Faculty of Social Sciences;  
37  
38 University of Stirling, Stirling, FK9 4LA, Scotland, United Kingdom.  
39  
40

41  
42  
43 **Word count:** 3680  
44  
45  
46  
47  
48  
49  
50  
51  
52  
53  
54  
55  
56  
57  
58  
59  
60

## ABSTRACT

### Introduction

Public health responses to the coronavirus (COVID-19) pandemic have reaped adverse physical, psychological, social and economic effects, with older people disproportionately affected. Psychological consequences of the pandemic include fear, worry and anxiety. COVID-19 fear may impact individuals' mitigation behaviours, influencing their willingness to (re)engage in health, social and economic behaviours. This study seeks (1) to develop a robust and evidence-based questionnaire to measure the prevalence of COVID-19 fear among older people (aged  $\geq 50$ ) in Scotland; (2) to examine the impact of COVID-19 fear on the willingness of older people to (re)engage across health, social, and economic domains as society adjusts to the 'new normal' and inform policy and practice.

### Methods and analysis

This mixed-method study includes a large-scale multimodal survey, focus groups and interviews with older people (aged  $\geq 50$ ) living in Scotland, and an email-based 'e-Delphi' consultation with professionals working with older people. The COVID-19 fear scale was developed and validated using exploratory and confirmatory factor analyses. Survey data will be analysed using descriptive and inferential statistics. Thematic analysis will be used to analyse qualitative data. Survey and qualitative findings will be triangulated and used as the starting point for an 'e-Delphi' consensus consultation with expert stakeholders.

### Ethics and dissemination

Ethical approval has been obtained from the University of Stirling for multimodal survey development, fieldwork methodology and data management. Anonymised survey data will be deposited with the UK Data Service, with a link provided via the Gateway to Global Aging. Qualitative data will be deposited with the University of Stirling online digital repository - DataSTORRE. A dedicated work package will oversee dissemination via a co-produced project website, conference presentations, rapid reports and national and international peer-

1  
2  
3 reviewed journal articles. There is planned engagement with Scottish and UK policymakers  
4  
5 to contribute to the UK Government's COVID-19 recovery strategy.  
6  
7  
8

9 **Keywords:** COVID-19, fear, older people, health behaviour, social engagement, financial  
10  
11 behaviour, Scotland  
12  
13  
14  
15  
16  
17  
18  
19  
20  
21  
22  
23  
24  
25  
26  
27  
28  
29  
30  
31  
32  
33  
34  
35  
36  
37  
38  
39  
40  
41  
42  
43  
44  
45  
46  
47  
48  
49  
50  
51  
52  
53  
54  
55  
56  
57  
58  
59  
60

For peer review only

### Strengths and limitations of this study

- The study will develop a validated COVID-19 fear scale that will be available on the UK Data Service (including the broader survey instrument and data) for national and international research.
- The large-scale survey and qualitative findings will be triangulated to provide robust evidence on the COVID-19 health, social and economic effects on older people.
- The study will further develop Scotland's data infrastructure (Healthy Ageing in Scotland) to strengthen the capacity for ageing research within the UK.
- The study will produce a set of prioritised recommendations for interventions and/or policy impact.
- The survey sample is based on existing participants of HAGIS and Generation Scotland which has the advantage of enabling analyses across time periods before and during the pandemic and an inherent disadvantage of pre-existing sample bias.

## INTRODUCTION

The COVID-19 pandemic, caused by a novel SARS-CoV-2 coronavirus, has brought unprecedented disruption to our lives. Millions of people worldwide have been affected by the virus. Of these, older people and those with underlying health conditions, have experienced disproportionately greater adverse effects.<sup>1</sup> At the time of writing, the number of confirmed COVID-19 cases has surpassed 305 million and the number of deaths, 5.4 million.<sup>2</sup> In the UK, the rate of deaths among aged  $\geq 60$  attributed to COVID-19 (i.e., COVID-19 on the death certificate) is considerably higher compared to younger age groups.<sup>3</sup> Similar trends are reported in other countries.<sup>2</sup>

Early evidence suggesting that older people are at higher risk of contracting COVID-19 and developing suboptimal outcomes has prompted stringent government regulations seeking to protect this population.<sup>1</sup> The UK Government issued guidance to safeguard vulnerable people during the COVID-19 pandemic. These measures, although necessary and effective in minimising the spread of the virus, had adverse mental health effects on older people.<sup>4</sup> The pandemic has exacerbated feelings of social isolation and loneliness among older people in the UK, with approximately 1 in 2 people aged  $\geq 45$  reporting feelings of loneliness.<sup>5</sup>

Increasing evidence demonstrates the detrimental impact of social isolation and loneliness on the physical health and wellbeing of the elderly (e.g., increased blood pressure, heart disease, diminished immune system functioning, depression, anxiety, poorer cognitive functioning).<sup>6</sup> Older people with disabilities and those living in areas affected by deprivation are particularly at risk for emotional distress, poor quality of life and low wellbeing.<sup>4,7</sup> The negative mental health and psychological wellbeing effects of the COVID-19 pandemic on older people are well-evidenced in other countries.<sup>8,9,10</sup>

1  
2  
3 Fear is potentially mediating the link between the COVID-19 pandemic and its mental health  
4 and psychological wellbeing effects. Fear is characterised by emotive avoidance in relation  
5 to the stimulus.<sup>11</sup> Fear of encountering individuals who are possibly COVID-19 positive has  
6 been reported.<sup>12</sup> Evidence further suggests that behavioural responses to COVID-19 vary  
7 according to the level of COVID-19 fear.<sup>13</sup> A lower level of COVID-19 fear is associated with  
8 poor adherence to public health messages<sup>13</sup>, while an excessive level is associated with  
9 misattributing symptoms of seasonal colds or flu as COVID-19 and poorer quality of life  
10 across physical and psychological health, social relationships and environmental domains.<sup>14</sup>  
11  
12  
13  
14  
15  
16  
17  
18  
19  
20  
21

22 COVID-19 fear might affect individuals and society in a myriad of ways including (1) social  
23 isolation due to reservations around meeting others or engaging in pre-COVID activities; (2)  
24 poorer health and well-being due to (i) reluctance to engage with health professionals for  
25 fear of contracting COVID-19, or (ii) over-zealous self-referral due to high health anxiety; (3)  
26 weakened economic stability due to changing consumption and work patterns. There is a  
27 knowledge gap in relating these behavioural responses to COVID-19 fear among older  
28 people, who are arguably most vulnerable to poorer outcomes from COVID-19.  
29  
30  
31  
32  
33  
34  
35  
36  
37  
38

### 39 **RESEARCH AIMS**

40  
41  
42  
43 The overall aim is to explore how the spectrum of COVID-19 fear manifests in older people  
44 (aged  $\geq 50$ ) living in Scotland and how it impacts their health, social and economic  
45 behaviours.  
46  
47  
48  
49  
50  
51

### 52 **RESEARCH OBJECTIVES**

- 53  
54  
55  
56 1. To develop a robust and evidence-based COVID-19 fear instrument to measure  
57 the prevalence of COVID-19 fear among older people in Scotland  
58  
59  
60



1  
2  
3 2. To examine the impact of COVID-19 fear on the willingness of older people to re-  
4 engage across health, social, and economic domains as society adjusts to what may  
5 be termed the 'new normal' and inform policy and practice.  
6  
7  
8  
9  
10

## 11 **MAIN RESEARCH QUESTIONS**

12  
13  
14  
15

- 16 1. What is the prevalence of COVID-19 fear among older people living in Scotland?
- 17 2. How has COVID-19 fear impacted social connectedness?
- 18 3. How and to what extent did older people's use of information and communications  
19 technology (ICT) change during the lockdown?
- 20 4. What are the health predictors of COVID-19 fear, and are these socially graded?
- 21 5. How is COVID-19 fear associated with known barriers and facilitators to health  
22 service engagement (e.g., GP and hospital visits, screening programmes  
23 attendance)?
- 24 6. Has COVID-19 fear changed views about how long people expect to live and, if so,  
25 how far has it changed saving and spending behaviours?
- 26 7. How has COVID-19 fear changed consumption behaviours (e.g., alcohol  
27 consumption, transport use, attendance at live events, dining-out, television  
28 viewing)?
- 29 8. How has COVID-19 fear affected views on workplace preferences and working  
30 patterns?  
31  
32  
33  
34  
35  
36  
37  
38  
39  
40  
41  
42  
43  
44  
45  
46  
47  
48  
49

50 The findings will provide a robust understanding of how older people in Scotland have  
51 negotiated their response to different aspects of their life in the 'new normal'. These insights,  
52 which are relevant to the UK as a whole, will inform policy and interventions on key social,  
53 health and economic issues pertinent to societal recovery from the COVID-19 pandemic.  
54  
55  
56  
57  
58  
59  
60

## METHODS AND ANALYSIS

### Study design

This is a convergent, mixed-methods study comprising three phases: Phase 1: development of validated COVID-19 fear scale; Phase 2A: a large-scale survey using multimodal data collection; Phase 2B: interviews and focus groups conducted by academic researchers and community-based co-researcher volunteers; Phase 3: co-production of findings with professionals working with older people (e-Delphi exercise) to develop recommendations for policy and practice. A group of community-based co-researcher volunteers, sharing similar characteristics to our target population, will guide the development and implementation of these phases. Across the three phases, five work packages (WP) were developed, reflective of the multifaceted nature of the aims and objectives of this study. The focus of each WP is presented in Figure 1.

The quantitative strand of this work will promote the generalisability of findings in relation to the prevalence of COVID-19 fear among older people and its impact on behavioural responses to the pandemic. The qualitative strand will help to develop a deep and rich understanding of older adults' COVID-19 fears and worries, and pandemic related experiences and behaviours. The consensus consultation with expert stakeholders will help to inform policy and practice, with a view to achieving impact for the study. The study dates are from December 2020 to June 2022.

<<Insert Figure 1 here>>

Phase 1: Development of a scale to measure the prevalence of COVID-19 fear

#### *Initial item development*

1  
2  
3  
4  
5 The initial development of the COVID-19 fear items was informed by a rapid review of  
6 scientific and grey literature. We searched databases available via EBSCOhost, Web of  
7 Science and ScienceDirect for English language literature published after January 1991  
8 focusing on (i) generic pandemic fear and health anxiety, and (ii) COVID-19 fear, stress or  
9 worry. After assessing results, we developed a protocol for a more focused rapid review  
10 (registered with the International Prospective Register of Systematic Reviews under  
11 CRD42021250233). To meet review inclusion criteria, items needed to report the  
12 development or validation of instruments intended for use with adults to assess (i) the  
13 presence of a psychological state characterised as 'fear', 'worry', 'concern', 'anxiety' or other  
14 broadly synonymous descriptors, (ii) the experience or measure of the psychological state  
15 which had been precipitated by awareness of or perceptions related to the COVID-19  
16 pandemic and assessed in general or specific situations or in relation to specified contexts.  
17 We excluded literature describing (i) the development or validation of instruments in people  
18 aged  $\leq 16$ ; (ii) not accessing the psychological states of interest; (iii) combining assessment  
19 or measurement of fear with assessment or quantification of other personal characteristics  
20 (e.g., personality traits, health conditions); (iv) assessing psychological states prompted by  
21 any other events, infectious agents or diseases. The rapid literature review was  
22 supplemented with a review of existing longitudinal studies that had COVID-19 specific  
23 modules (e.g., COVIDLife, The Irish Longitudinal Study of Ageing, English Longitudinal  
24 Study of Ageing). Based on this and literature review findings, the research team developed  
25 potential dimensions and drafted 100 candidate items.  
26  
27  
28  
29  
30  
31  
32  
33  
34  
35  
36  
37  
38  
39  
40  
41  
42  
43  
44  
45  
46  
47  
48  
49  
50

### 51 *Sampling, recruitment and consent*

52  
53  
54  
55  
56 For the item reduction exercise, we recruited participants using Prolific<sup>15</sup>, in two rounds. In  
57 round one, eligible participants were aged  $\geq 18$  with IP addresses based within the UK. In  
58  
59  
60

1  
2  
3 round two, participants aged  $\geq 40$  with IP addresses based within the UK were eligible. The  
4 study was advertised as academic research on attitudes, expectations and perceptions  
5 about the COVID-19 pandemic and included a warning that the survey would cover topics of  
6 illness and death. Potential respondents were invited to view further details on the survey  
7 front page, which elicited their informed consent.  
8  
9  
10  
11  
12  
13  
14  
15

### 16 *Data collection and analysis*

17  
18  
19

20 Data for round one was collected between 12-15 March 2021. 262 respondents were  
21 recruited, of whom 241 completed all survey items. Explanatory factor analysis was  
22 conducted on the 100 candidate items using STATA v.15.1.<sup>16</sup> Explanatory factor analysis  
23 and parallel analysis identified candidate factors. Promax rotation identified items uniquely  
24 loading on each factor. These analyses delivered seven factors. The items associated with  
25 these factors were then tested for clarity and precision by co-researchers on our study in  
26 Think Aloud sessions.<sup>17</sup> The Think Aloud process allows for respondents to complete the  
27 survey in the presence of a researcher and speak their thoughts as they formulate their  
28 responses.  
29  
30  
31  
32  
33  
34  
35  
36  
37  
38  
39  
40

41 After checking the item comprehensibility with the co-researchers, we recruited an additional  
42 527 respondents for the second round of explanatory and confirmatory factor analyses.  
43 Participants were recruited using Prolific<sup>15</sup> between 4-7 May 2021. Exploratory factor  
44 analysis was conducted on 263 respondents, yielding five factors and 14 items with high  
45 factor loadings. We analysed the properties of 14 items using confirmatory factor analysis on  
46 the rest of the sample ( $n = 264$ ) and found satisfactory internal consistency, as measured by  
47 Cronbach's alpha. Scale development is now complete. The development, validation  
48 process and final scale are reported in Comerford et al., 2022,<sup>18</sup> which is under review at the  
49 time of writing this protocol.  
50  
51  
52  
53  
54  
55  
56  
57  
58  
59  
60

1  
2  
3 Phase 2A: A large-scale cross-sectional survey using multimodal data collection  
4  
5  
6

7 *Sampling, recruitment and consent*  
8  
9

10  
11 Eligible participants are aged  $\geq 50$  and live in Scotland at the time of data collection. The  
12 target sample is derived from two existing Scottish longitudinal studies - Healthy Ageing In  
13 Scotland (HAGIS) and Generation Scotland (n=15,074 participants) comprises. With an  
14 estimated response rate of 25%, this sample will potentially provide >3,700 completed  
15 surveys. The respondents who previously consented to future re-contact will be approached  
16 for consent to take part in this study. Additionally, a predefined panel of 600 participants is  
17 invited to take part in the online survey to address anticipated bias within the sample.  
18  
19  
20  
21  
22  
23  
24  
25  
26  
27

28 *Data collection and analysis*  
29  
30

31  
32 Online mode: Eligible online participants receive an electronic invitation letter with an  
33 enclosed link to the study website (www.hagis.scot) and a personalised link to the survey.  
34 The website describes the study, how to take part in the survey and how to get more  
35 information (including an email and a Freephone number to connect directly to study staff).  
36 The online survey takes 35-45 minutes to complete and is hosted on the Qualtrics XM  
37 Platform.<sup>19</sup> Participants receive a reminder following 2 weeks post-invitation.  
38  
39  
40  
41  
42  
43  
44  
45  
46  
47  
48  
49

50 Telephone mode: Participants for telephone interviews are approached by DJS Research  
51 interviewers who explain the study, how to get more information about the study and arrange  
52 a suitable time for the interview. The survey takes approximately 60-75 minutes to complete.  
53 Survey responses are initially entered into the Telephone Assisted Personal Interview (TAPI)  
54 system and then transferred into the Qualtrics XM Platform.<sup>19</sup>  
55  
56  
57  
58  
59  
60

1  
2  
3 Postal mode: All eligible postal participants receive a postal invitation letter, information  
4 leaflet, paper-based survey and reply-paid envelope. The survey takes between 45-50  
5 minutes to complete. All postal participants are offered the option to take part in the survey  
6 electronically, in what may be termed as a 'nudge to web' approach. The reminder postcards  
7 are sent to participants 3 weeks post-invitation.  
8  
9  
10  
11  
12

13  
14  
15 Panel: DJS Research (social marketing agency appointed to support fieldwork activities) will  
16 recruit panellists to the study via an electronic invitation. The panellists who express interest  
17 to participate will be directed to an online survey hosted by DJS Research using Nebu.<sup>20</sup>  
18 Panellists are paid for completing the survey, at a rate of £12 per survey.  
19  
20  
21  
22  
23  
24  
25

26 The survey is largely based on the HAGIS survey<sup>21</sup> to include validated instruments for  
27 demographics, social circumstances, employment, physical health, mental health, health  
28 behaviour, social connectedness, and social participation. This was further developed by  
29 drawing on the research team expertise, enhanced by relevant literature searches to include  
30 other instruments, e.g., vaccination status and attitudes. The COVID-19 fear scale is  
31 incorporated into the survey instrument. The instrument is refined and pre-tested to ensure  
32 completion between 35-45 minutes, including the use of topic randomisation for the online  
33 mode. The survey has been launched on 11 October 2021; survey fieldwork will be complete  
34 by end of January 2022.  
35  
36  
37  
38  
39  
40  
41  
42  
43  
44  
45  
46

47 Descriptive and inferential statistics will be generated using STATA v.15.1.<sup>16</sup> Differences  
48 between sub-groups continuous variables will be assessed by one-way analysis of variance  
49 and for categorical variables by the chi-squared test of independence. Correlates of COVID-  
50 19 fear will be identified using univariate and multivariate regression analyses. Additional  
51 inferential statistical data analyses will depend on the specific research questions to be  
52 addressed in the health, social and economic work packages. Detailed analyses will  
53  
54  
55  
56  
57  
58  
59  
60

1  
2  
3 therefore be reported in the publication of each study. Survey weights will be estimated and  
4  
5 made available for analyses.  
6  
7  
8

9 Phase 2B: Interviews and focus groups  
10  
11  
12

13 *Sampling, recruitment and consent*  
14  
15  
16

17  
18 Semi-structured interviews and small focus groups (2-3 participants) will be conducted with  
19  
20 50 people aged  $\geq 50$  who are currently living in Scotland and have the capacity to consent to  
21  
22 participate in the study. Recruitment will be targeted to ensure representation of participants  
23  
24 with diverse background characteristics - age category (50s, 60s, 70s,  $\geq 80$ s), geographical  
25  
26 location (rural and urban, across Scotland); gender, ethnicity, sexual orientation; and socio-  
27  
28 economic position. A one-page recruitment advertisement poster will be designed to  
29  
30 facilitate recruitment. The poster will be posted on the study's website and social media  
31  
32 (Twitter, Facebook, Instagram) and the University of Stirling's website. Participants will also  
33  
34 be recruited through the co-researchers' professional and social networks and the study  
35  
36 partners' networks.  
37  
38  
39  
40

41 An information sheet will be provided to the potential participants; written informed consent  
42  
43 will be sought prior to the interview being conducted. If the consent form is not returned  
44  
45 before the interview, the member of the team will obtain oral consent, which will be recorded.  
46  
47  
48  
49

50 *Data collection and analysis*  
51  
52  
53

54 The semi-structured interviews and focus groups will be conducted collaboratively by a  
55  
56 member of the research team and a co-researcher. The format will be relatively flexible, with  
57  
58 the technical aspects (i.e., welcome and introduction, a brief presentation of the research,  
59  
60

1  
2  
3 recording etc.) being covered by the member of the academic team and the questions being  
4 asked by a co-researcher. For each interview and focus group, the researchers will meet  
5 approximately 30 minutes prior to the participant joining to discuss how the interview and  
6 focus group should be conducted. After the interview or focus group has concluded, the  
7 researchers will conduct a debrief discussion.  
8  
9  
10  
11  
12

13  
14  
15  
16 The interviews will take approximately an hour and focus groups around 1.5 hours. The  
17 participants will be asked whether they prefer to participate in an interview or a focus group.  
18  
19 The interviews will be conducted either online, using the platforms Microsoft Teams or  
20 Zoom, or face-to-face (subject to individual preference and COVID-19 regulations). All focus  
21 groups will be conducted online for safety reasons. The topic guide includes questions on  
22 COVID-19 fear and worries, social and intergenerational connectedness, use of ICT  
23 (frequency and purpose) during the pandemic and digital exclusion. Data collection started in  
24 November 2021; the data collection is ongoing and expected to conclude in Spring 2022.  
25  
26  
27  
28  
29  
30  
31  
32

33  
34  
35 The data will be analysed in collaboration with the co-researchers using thematic analysis.<sup>22</sup>  
36 NVivo v.12<sup>23</sup> will be used for deductive coding of data.  
37  
38  
39  
40

41 Phase 3: Development of recommendations for policy and practice  
42  
43  
44

#### 45 *Sampling, recruitment and consent*

46  
47  
48

49 An email-based e-Delphi consultation informed by Belton et al.'s (2019)<sup>24</sup> 'six-step  
50 prescription' will combine findings from qualitative and quantitative strands across multiple  
51 iterations of asynchronous consultation with a panel of 30 professionals working with older  
52 people across social, health, and economic contexts. Relevant organisations (service  
53 providers, charitable organisations, etc.) will be asked to suggest a potential expert panellist  
54 who may join the study. Potential panellists will be sent an information sheet containing  
55  
56  
57  
58  
59  
60



1  
2  
3 details of what will be involved in an e-Delphi consultation and asked to provide written  
4  
5 consent to participation before the consultation begins.  
6  
7  
8

9  
10 *Data collection and development of recommendations*  
11

12  
13 Panellists will complete three rounds of an electronic survey. The first will explore panellists'  
14  
15 perceptions of changes in older people's engagement with social, health and economic  
16  
17 activities during the pandemic and share their perceptions of the needs and priorities for  
18  
19 impact (e.g., intervention and/or policy). The second survey will be informed by the summary  
20  
21 analysis of the first survey, preliminary findings from preceding study fieldwork (phase 2) and  
22  
23 will re-explore the panel's recommendations and priorities. The third and final survey,  
24  
25 accompanied by a summary analysis of the second, will explore the extent to which, and  
26  
27 reasons why panellists prioritise their recommendations. The output of the e-Delphi exercise  
28  
29 will produce a set of recommendations for action that incorporate the rationale and priorities  
30  
31 based on professionals' experience and expertise.  
32  
33  
34  
35  
36

37 Through this iterative approach, we will arrive at recommendations for practice and policy to  
38  
39 ameliorate the impacts of COVID-19 fear. The recommendations will take into account the  
40  
41 experiences of older people as reflected in the qualitative and quantitative data from other  
42  
43 phases of the study and will be informed by expert panellists' real-world experience when  
44  
45 supporting older people during the pandemic.  
46  
47  
48

49 **PATIENT AND PUBLIC INVOLVEMENT**  
50

51  
52  
53 We will establish a group of up to twelve older people (aged  $\geq 50$ ) living in Scotland who will  
54  
55 act as community-based co-researcher volunteers within the study. The primary aim of this  
56  
57 group is to ensure that the voices of people over 50 are appropriately represented in the  
58  
59 study and for them to act as 'experts by experience' across all study phases and related  
60

1  
2  
3 activities. Their input will be key in ensuring that the study participants are provided with  
4 research documentation that enables them to make fully informed choices around  
5 participation and consent, and that study outputs are accessible to a wide range of  
6 professional and lay stakeholder groups. The co-researchers will meet monthly using an  
7 online platform and in-person when possible, taking into account the Scottish Government  
8 and University guidance. Co-researchers will be provided with equipment and training to  
9 support their engagement online as well as research training to enable qualitative data  
10 collection and analysis.  
11  
12  
13  
14  
15  
16  
17  
18  
19  
20  
21

22 Co-researchers will be recruited through existing networks of the research team as well as  
23 announcements on social media. Members of the team will be provided with information and  
24 terms of reference for the group and will be asked to sign a volunteer agreement. The co-  
25 researchers will be actively engaged in the development of the COVID-19 fear scale and  
26 design of the survey questions; design of interview and focus groups topic guides; qualitative  
27 data collection; qualitative data analysis; interpretation of research findings; and  
28 communication of research outputs to a lay audience.  
29  
30  
31  
32  
33  
34  
35  
36  
37  
38

### 39 **ETHICS AND DISSEMINATION**

40  
41  
42  
43 We have a dedicated work package responsible for Ethics, Research Governance and Data  
44 Management (see Figure 1). Ethics applications are developed in phases with regards to  
45 survey development, fieldwork methodology and data management due to the  
46 interdependency across the mixed-methods sub-studies. The study seeks to recruit  
47 participants of the HAGIS pilot study and extend the sample to Generation Scotland  
48 participants. Re-contacting these participants will require the processing of identifiable data,  
49 including contact details (postal address, telephone number, email). These data will be used  
50 for re-consent purposes and the provision of survey only. Returned survey questionnaires  
51 will utilise anonymised reference codes to protect the privacy and ensure anonymity.  
52  
53  
54  
55  
56  
57  
58  
59  
60

1  
2  
3 Data management is guided by ESRC Research Data Policy.<sup>25</sup> Key ethical considerations  
4 are (1) data security and anonymity; and (2) potential sensitivity of COVID-19 fear topic to  
5 the older age group. The research team is experienced in the handling of sensitive data and  
6 knowledgeable of protocols, best practices, and ethical and legal requirements for  
7 processing this type of data. We will ensure the adherence and compliance of the research  
8 team to standard protocols and practise (i.e., Data Process Impact Assessment, Data  
9 Sharing Agreements, the UK General Data Protection Regulation (UK GDPR)). All  
10 researchers involved in data collection will complete the MRC Research, UK GDPR and  
11 Confidentiality training courses. We will anticipate and plan for a potential upset that may be  
12 caused by sensitive topics. All study participants will be provided with a study email and a  
13 Freephone number to contact the team. Direct contact details to the Principal Investigator,  
14 Dr Elaine Douglas, are made available to all those approached to take part in the study.  
15  
16  
17  
18  
19  
20  
21  
22  
23  
24  
25  
26  
27  
28  
29  
30

31 Ethical approval has been obtained for the development of a validated COVID-19 Fear  
32 Scale, the establishment of the Older Persons Advisory Group (co-researchers), the survey  
33 development and fieldwork, conduct of interviews and focus groups from the General  
34 University Ethics Panel at the University of Stirling. To enable the rapid commencement of  
35 projects the University of Stirling has brought in an expedited review of applications for  
36 ethics approval and priority response from legal, human resource and finance professional  
37 services. Data sharing with other parties will be subject to a Data Sharing Agreement, the  
38 use of strict security protocols, and ethical approval.  
39  
40  
41  
42  
43  
44  
45  
46  
47  
48  
49

50 The survey will provide a rich data resource accessible for future scientific research.  
51 Anonymised survey data will be deposited with the UK Data Service.<sup>26</sup> The data will be  
52 accessible free of charge for non-commercial users. We will conform to the Data  
53 Documentation Initiative standard, which is used by the UK Data Service. The link to  
54 deposited data will be made available on the study website ([www.hagis.scot](http://www.hagis.scot)) and via the  
55 Gateway to Global Aging<sup>27</sup> - a public platform developed to facilitate cross-national and  
56  
57  
58  
59  
60

1  
2  
3 longitudinal analyses of studies focusing on ageing, health and retirement around the world.  
4  
5 Our study is included in the Gateway's digital library to facilitate national and international  
6  
7 research. Qualitative data will be deposited with the University of Stirling online digital  
8  
9 repository - DataSTORRE.  
10

11  
12  
13 We will share the findings via the study's website, rapid reports, academic publications,  
14  
15 webinars, and presentations at national and international conferences. Rapid reports will  
16  
17 provide timely access to emerging findings and academic publications to address key  
18  
19 research questions. There is planned dissemination to Scottish and UK policymakers and  
20  
21 partners. An Expert Advisory Board will be established to provide opportunities for the study  
22  
23 to receive feedback and advice, and to consolidate relationships between the network of  
24  
25 interdisciplinary experts in ageing studies, gerontology, economics and public health to  
26  
27 support and sustain HAGIS in the longer term.  
28  
29  
30  
31  
32  
33  
34  
35  
36  
37  
38  
39  
40  
41  
42  
43  
44  
45  
46  
47  
48  
49  
50  
51  
52  
53  
54  
55  
56  
57  
58  
59  
60

## Figure 1. Study phases linked to work packages

**Acknowledgements:** We are thankful to Olivia Olivarius and Cate Pemble for their support with the development of the Worries Emerging from the COVID-19 Pandemic (WECF) scale and the survey instrument. We are extremely grateful to our community-based co-researchers Roy Anderson, Elizabeth Chrystall, David Curry, Margot Fairclough, Christine Ritchie, Pat Scrutton and Ann Smith who have contributed extensively to the development of project materials and qualitative fieldwork.

**Competing interests** Authors declare no competing interests.

### Funding statement

This work was funded by the Economic and Social Research Council (ESRC) as part of the UK Research and Innovation (UKRI) rapid response to COVID-19. Grant number: ES/V01711X/1.

**Authors' contributions:** ED developed the research concept and design and gained funding. ED, SA, TB, DC, LMcG, LMcC, and CD contributed to the development of the first draft of the manuscript. SA revised and edited the subsequent manuscript drafts based on the comments from all the authors. All authors read and approved the final manuscript.

## References

1. World Health Organization (WHO). Coronavirus disease (COVID-19), 2020. Available: [https://www.who.int/health-topics/coronavirus#tab=tab\\_1](https://www.who.int/health-topics/coronavirus#tab=tab_1) [Accessed 18 November 2021].
2. World Health Organization (WHO). WHO Coronavirus (COVID-19) Dashboard, 2021. Available: <https://covid19.who.int> [Accessed 10 January 2022].
3. UK Government. GOV.UK Coronavirus (COVID-19) in the UK, 2021. Available: <https://coronavirus.data.gov.uk/details/deaths> [Accessed 18 November 2021].
4. Steptoe A, Di Gessa G. Mental health and social interactions of older people with physical disabilities in England during the COVID-19 pandemic: a longitudinal cohort study. *The Lancet Public Health*. 2021;6:e365-e373.
5. Groarke JM, Berry E, Graham-Wisener L, McKenna-Plumley PE, McGlinchey E, Armour C. Loneliness in the UK during the COVID-19 pandemic: Cross-sectional results from the COVID-19 Psychological Wellbeing Study. *PloS One* 2020;15:e0239698.
6. Nicholson NR. A review of social isolation: an important but underassessed condition in older adults. *The Journal of Primary Prevention* 2012;33:137-52.
7. Buffel T, Yarker S, Phillipson C, Lang L, Lewis C, Doran P, Goff M. Locked down by inequality: Older people and the COVID-19 pandemic. *Urban Studies* 2021;6:00420980211041018.

1  
2  
3 8. Asmundson GJ, Taylor S. How health anxiety influences responses to viral outbreaks like  
4 COVID-19: What all decision-makers, health authorities, and health care professionals need  
5 to know. *Journal of Anxiety Disorders* 2020;71:102211.  
6  
7  
8

9  
10  
11 9. Galea S, Merchant RM, Lurie N. The mental health consequences of COVID-19 and  
12 physical distancing: the need for prevention and early intervention. *JAMA Internal Medicine*  
13 2020;180:817-8.  
14  
15  
16

17  
18  
19  
20 10. Kola L, Kohrt BA, Hanlon C, Naslund JA, Sikander S, Balaji M, Benjet C, Cheung EY,  
21 Eaton J, Gonsalves P, Hailemariam M. COVID-19 mental health impact and responses in  
22 low-income and middle-income countries: reimagining global mental health. *The Lancet*  
23 *Psychiatry* 2021;8:535-550.  
24  
25  
26  
27

28  
29  
30 11. Perin C, Beghi M, Cerri CG, Peroni F, Viganò B, Cornaggia CM. Experience of group  
31 conversations in rehabilitation medicine: methodological approach and pilot study. *Journal of*  
32 *Medicine and the Person* 2015;13:96-104.  
33  
34  
35  
36

37  
38  
39 12. Lin CY. Social reaction toward the 2019 novel coronavirus (COVID-19). *Social Health*  
40 *and Behavior* 2020;3:1.  
41  
42  
43

44  
45 13. Harper CA, Satchell LP, Fido D, Litzman RD. Functional fear predicts public health  
46 compliance in the COVID-19 pandemic. *International Journal of Mental Health and Addiction*  
47 2020;19,1875-1888.  
48  
49  
50

51  
52  
53 14. Choi EP, Hui BP, Wan EY, Kwok JY, Tam TH, Wu C. Covid-19 and health-related quality  
54 of life: A community-based online survey in Hong Kong. *International Journal of*  
55 *Environmental Research and Public Health* 2021;18:3228.  
56  
57  
58  
59  
60

- 1  
2  
3 15. Prolific. Prolific 2021: London, UK. Available: <https://www.prolific.co>  
4  
5  
6  
7 16. StataCorp. Stata Statistical Software: Release 15, 2017. College Station, TX: StataCorp  
8 LP.  
9  
10  
11  
12  
13 17. Eccles DW, Aarsal G. The think aloud method: what is it and how do I use it?. *Qualitative*  
14 *Research in Sport, Exercise and Health* 2017;9:514-31.  
15  
16  
17  
18  
19 18. Comerford DA, Olivarius O, Bell DNF, Douglas, E. Validation of the Worries Emerging  
20 from the Covid-19 Pandemic (WECP) Scale. Working Paper. DOI:  
21 [10.13140/RG.2.2.18434.40642](https://doi.org/10.13140/RG.2.2.18434.40642)  
22  
23  
24  
25  
26  
27  
28 19. Qualtrics. Qualtrics, 2021: Provo, Utah, USA. Available: <https://www.qualtrics.com>  
29 [Accessed 1 March 2021].  
30  
31  
32  
33  
34 20. Nebu. Nebu BV, 2022: The Netherlands. Available: <https://www.nebu.com>  
35  
36  
37  
38  
39 21. Douglas E, Rutherford A, Bell D. Pilot study protocol to inform a future longitudinal study  
40 of ageing using linked administrative data: Healthy AGEing In Scotland (HAGIS). *BMJ Open*  
41 2018;8:e018802.  
42  
43  
44  
45  
46  
47 22. Braun V, Clarke V. Using thematic analysis in psychology. *Qualitative Research in*  
48 *Psychology* 2006;3:77-101.  
49  
50  
51  
52  
53 23. QSR International. NVivo 12, 2018. Available: [https://www.qsrinternational.com/nvivo/](https://www.qsrinternational.com/nvivo/enabling-research/the-new-nvivo)  
54 [enabling-research/ the- new- nvivo](https://www.qsrinternational.com/nvivo/enabling-research/the-new-nvivo)  
55  
56  
57  
58  
59  
60



1  
2  
3 24. Belton I, MacDonald A, Wright G, Hamlin I. Improving the practical application of the  
4  
5 Delphi method in group-based judgment: A six-step prescription for a well-founded and  
6  
7 defensible process. *Technological Forecasting and Social Change* 2019;147:72-82.  
8  
9

10  
11 25. Economic and Social Research Council (ESRC). ESRC Research Data Policy, 2021.  
12  
13 Available: <https://www.ukri.org/publications/esrc-research-data-policy/> [Accessed 20  
14  
15 December 2019].  
16  
17

18  
19  
20 26. UK Data Service. Deposit data, 2021. Available: [https://ukdataservice.ac.uk/help/deposit-](https://ukdataservice.ac.uk/help/deposit-data/deposit-in-the-curated-data-repository/)  
21  
22 [data/deposit-in-the-curated-data-repository/](https://ukdataservice.ac.uk/help/deposit-data/deposit-in-the-curated-data-repository/) [Accessed 13 January 2021].  
23  
24

25  
26 27. Gateway to Global Aging. Gateway to Global Aging Data, 2015. Available:  
27  
28 <https://g2aging.org> [Accessed 13 January 2021].  
29  
30

1  
2  
3  
4  
5  
6  
7  
8  
9  
10  
11  
12  
13  
14  
15  
16  
17  
18  
19  
20  
21  
22  
23  
24  
25  
26  
27  
28  
29  
30  
31  
32  
33  
34  
35  
36  
37  
38  
39  
40  
41  
42  
43  
44  
45  
46  
47  
48  
49  
50  
51  
52  
53  
54  
55  
56  
57  
58  
59  
60

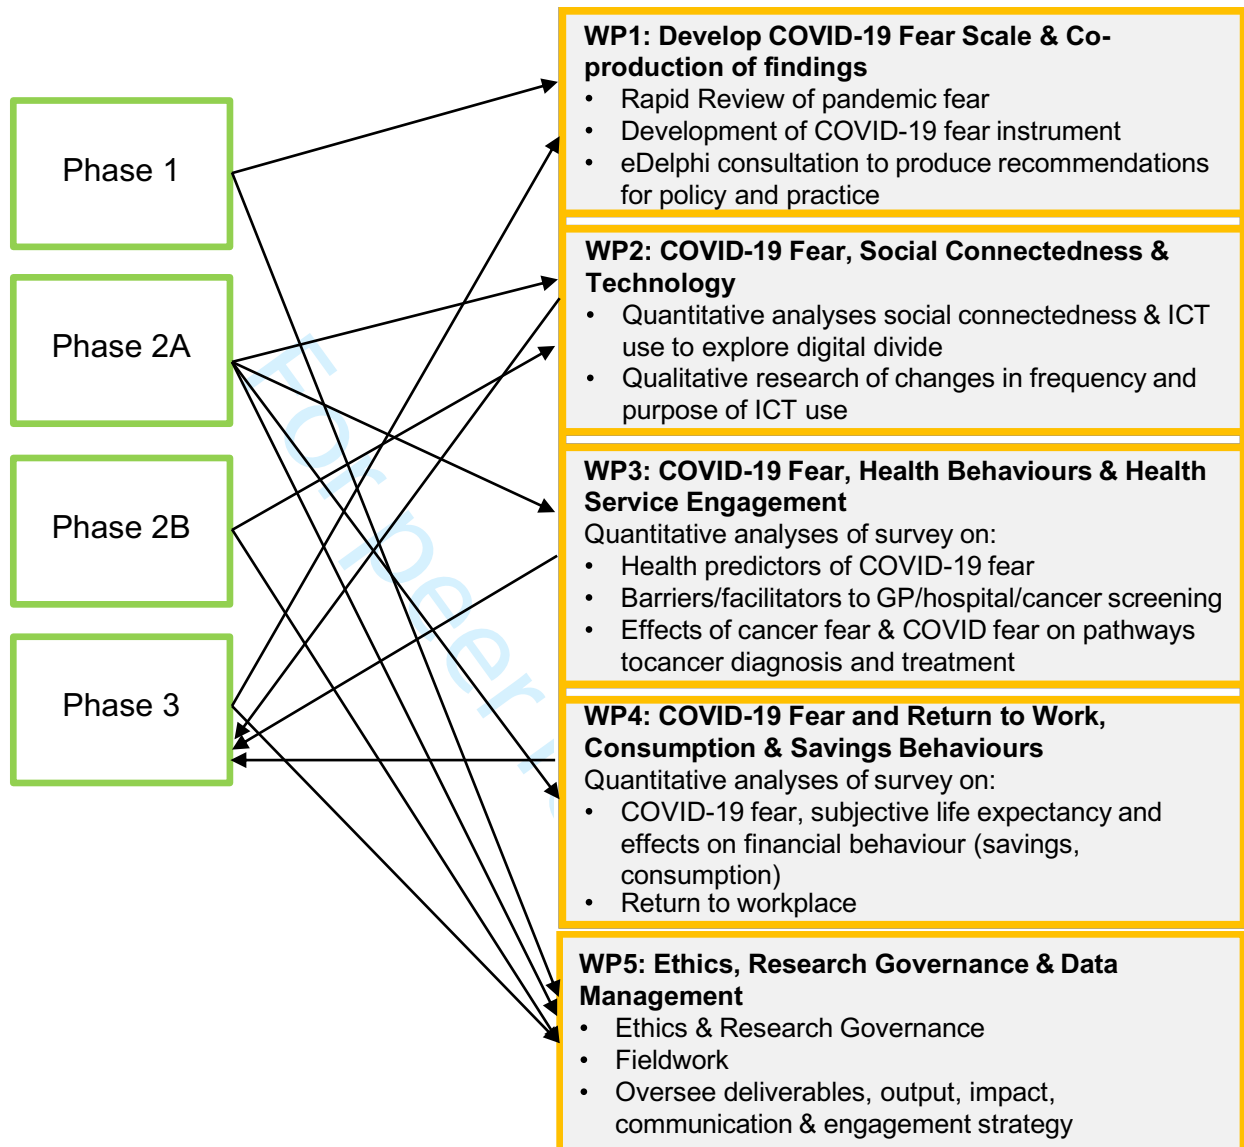

# BMJ Open

## The social, health and economic impact of COVID-19 – Healthy Ageing In Scotland (HAGIS): a protocol for a mixed- methods study

|                                 |                                                                                                                                                                                                                                                                                                                                                                                                                                                                                                                                                                                                                                                                                                                                                                                                                                                                                                                                                                                                                                                                                                                                         |
|---------------------------------|-----------------------------------------------------------------------------------------------------------------------------------------------------------------------------------------------------------------------------------------------------------------------------------------------------------------------------------------------------------------------------------------------------------------------------------------------------------------------------------------------------------------------------------------------------------------------------------------------------------------------------------------------------------------------------------------------------------------------------------------------------------------------------------------------------------------------------------------------------------------------------------------------------------------------------------------------------------------------------------------------------------------------------------------------------------------------------------------------------------------------------------------|
| Journal:                        | <i>BMJ Open</i>                                                                                                                                                                                                                                                                                                                                                                                                                                                                                                                                                                                                                                                                                                                                                                                                                                                                                                                                                                                                                                                                                                                         |
| Manuscript ID                   | bmjopen-2022-061427.R1                                                                                                                                                                                                                                                                                                                                                                                                                                                                                                                                                                                                                                                                                                                                                                                                                                                                                                                                                                                                                                                                                                                  |
| Article Type:                   | Protocol                                                                                                                                                                                                                                                                                                                                                                                                                                                                                                                                                                                                                                                                                                                                                                                                                                                                                                                                                                                                                                                                                                                                |
| Date Submitted by the Author:   | 29-Sep-2022                                                                                                                                                                                                                                                                                                                                                                                                                                                                                                                                                                                                                                                                                                                                                                                                                                                                                                                                                                                                                                                                                                                             |
| Complete List of Authors:       | Arakelyan, Stella; University of Stirling, Centre for Environment, Dementia and Ageing Research (CEDAR), Faculty of Social Sciences<br>Brown, Tamara; University of Stirling, Centre for Environment, Dementia and Ageing Research (CEDAR), Faculty of Social Sciences<br>McCabe, Louise; University of Stirling, Centre for Environment, Dementia and Ageing Research (CEDAR), Faculty of Social Sciences<br>McGregor, Lesley ; University of Stirling, Division of Psychology, Faculty of Natural Sciences<br>Comerford, David; University of Stirling, Stirling Management School<br>Dawson, Alison; University of Stirling, Centre for Environment, Dementia and Ageing Research (CEDAR), Faculty of Social Sciences<br>Bell, David; University of Stirling, Division of Economics<br>Douglas, Cristina; University of Stirling, Centre for Environment, Dementia and Ageing Research (CEDAR), Faculty of Social Sciences<br>Houston, John; University of Stirling, Stirling Management School<br>Douglas, Elaine; University of Stirling, Centre for Environment, Dementia and Ageing Research (CEDAR), Faculty of Social Sciences |
| <b>Primary Subject Heading</b>: | Public health                                                                                                                                                                                                                                                                                                                                                                                                                                                                                                                                                                                                                                                                                                                                                                                                                                                                                                                                                                                                                                                                                                                           |
| Secondary Subject Heading:      | Mental health                                                                                                                                                                                                                                                                                                                                                                                                                                                                                                                                                                                                                                                                                                                                                                                                                                                                                                                                                                                                                                                                                                                           |
| Keywords:                       | COVID-19, PUBLIC HEALTH, MENTAL HEALTH                                                                                                                                                                                                                                                                                                                                                                                                                                                                                                                                                                                                                                                                                                                                                                                                                                                                                                                                                                                                                                                                                                  |
|                                 |                                                                                                                                                                                                                                                                                                                                                                                                                                                                                                                                                                                                                                                                                                                                                                                                                                                                                                                                                                                                                                                                                                                                         |

SCHOLARONE™  
Manuscripts

1  
2  
3 **Title:** The social, health and economic impact of COVID-19 – Healthy Ageing In Scotland  
4  
5 (HAGIS): a protocol for a mixed-methods study  
6  
7  
8

9 **Authors:** Stella Arakelyan<sup>1</sup>, Tamara Brown<sup>1</sup>, Louise McCabe<sup>1</sup>, Lesley McGregor<sup>2</sup>, David  
10  
11 Comerford<sup>3</sup>, Alison Dawson<sup>1</sup>, David Bell<sup>3</sup>, Cristina Douglas<sup>1</sup>, John Houston<sup>3</sup>, Elaine Douglas<sup>1</sup>  
12  
13

14  
15  
16 <sup>1</sup>Centre for Environment, Dementia and Ageing Research (CEDAR), Faculty of Social  
17  
18 Sciences, University of Stirling, Stirling, FK9 4LA, Scotland, United Kingdom.  
19

20  
21 <sup>2</sup>Division of Psychology, Faculty of Natural Sciences, University of Stirling, Stirling, FK9 4LA,  
22  
23 Scotland, United Kingdom  
24

25  
26  
27 <sup>3</sup>Stirling Management School, University of Stirling, Stirling, FK9 4LA, Scotland, United  
28  
29 Kingdom.  
30

31  
32  
33  
34 **\*Corresponding author:** Dr Elaine Douglas; Email: [elaine.douglas@stir.ac.uk](mailto:elaine.douglas@stir.ac.uk); Centre for  
35  
36 Environment, Dementia and Ageing Research (CEDAR), Faculty of Social Sciences;  
37  
38 University of Stirling, Stirling, FK9 4LA, Scotland, United Kingdom.  
39  
40

41  
42  
43 **Word count: 4181**  
44  
45  
46  
47  
48  
49  
50  
51  
52  
53  
54  
55  
56  
57  
58  
59  
60

## ABSTRACT

### Introduction

Public health responses to the coronavirus (COVID-19) pandemic have reaped adverse physical, psychological, social and economic effects, with older adults disproportionately affected. Psychological consequences of the pandemic include fear, worry and anxiety. COVID-19 fear may impact individuals' mitigation behaviours, influencing their willingness to (re)engage in health, social and economic behaviours. This study seeks (1) to develop a robust and evidence-based questionnaire to measure the prevalence of COVID-19 fear among older adults (aged  $\geq 50$ ) in Scotland; (2) to examine the impact of COVID-19 fear on the willingness of older adults to (re)engage across health, social, and economic domains as society adjusts to the 'new normal' and inform policy and practice.

### Methods and analysis

This mixed-method study includes a large-scale multimodal survey, group and interviews with older adults (aged  $\geq 50$ ) living in Scotland, and an email-based 'e-Delphi' consultation with professionals working with older people. The COVID-19 fear scale was developed and validated using exploratory and confirmatory factor analyses. Survey data will be analysed using descriptive and inferential statistics. Thematic analysis will be used to analyse qualitative data. Survey and qualitative findings will be triangulated and used as the starting point for an 'e-Delphi' consensus consultation with expert stakeholders.

### Ethics and dissemination

Ethical approval has been obtained from the University of Stirling for multimodal survey development, fieldwork methodology and data management. Anonymised survey data will be deposited with the UK Data Service, with a link provided via the Gateway to Global Aging. Qualitative data will be deposited with the University of Stirling online digital repository - DataSTORRE. A dedicated work package will oversee dissemination via a co-produced project website, conference presentations, rapid reports and national and international peer-

1  
2  
3 reviewed journal articles. There is planned engagement with Scottish and UK policymakers  
4  
5 to contribute to the UK Government's COVID-19 recovery strategy.  
6  
7  
8

9 **Keywords:** COVID-19, fear, older adults, health behaviour, social engagement, financial  
10  
11 behaviour, Scotland  
12  
13  
14  
15  
16  
17  
18  
19  
20  
21  
22  
23  
24  
25  
26  
27  
28  
29  
30  
31  
32  
33  
34  
35  
36  
37  
38  
39  
40  
41  
42  
43  
44  
45  
46  
47  
48  
49  
50  
51  
52  
53  
54  
55  
56  
57  
58  
59  
60

For peer review only

### Strengths and limitations of this study

- The survey sample will be based on existing participants of HAGIS and Generation Scotland which has the advantage of enabling analyses across time periods before and during the pandemic.
- The large-scale survey and qualitative findings will be triangulated to provide robust evidence on the COVID-19 health, social and economic effects on older adults.
- The survey sample has an inherent disadvantage of pre-existing sampling bias.
- Multimodal survey data collection is likely to introduce selection bias which needs to be corrected by adjusting for observable correlates of bias such as age, gender, and level of educational attainment.

## INTRODUCTION

The COVID-19 pandemic, caused by a novel SARS-CoV-2 coronavirus, has brought unprecedented disruption to our lives. Millions of people worldwide have been affected by the virus. Of these, older adults and those with underlying health conditions, have experienced disproportionately greater adverse effects [1]. At the time of writing, the number of confirmed COVID-19 cases has surpassed 305 million, and the number of deaths - 5.4 million [2]. In the UK, the rate of deaths among those aged  $\geq 60$  attributed to COVID-19 (i.e., COVID-19 on the death certificate) is considerably higher compared to younger age groups [3]. Similar trends are reported in other countries [2].

Early evidence suggesting that older adults are at higher risk of contracting COVID-19 and developing suboptimal outcomes has prompted stringent government regulations seeking to protect this population [1]. The UK Government issued guidance to safeguard vulnerable people during the COVID-19 pandemic. These measures, although necessary and effective in minimising the spread of the virus, had adverse mental health effects on older adults [4]. The pandemic has exacerbated feelings of social isolation and loneliness among older adults in the UK, with approximately 1 in 2 people aged  $\geq 45$  reporting feelings of loneliness [5].

Increasing evidence demonstrates the detrimental impact of social isolation and loneliness on the physical health and wellbeing of the elderly (e.g., increased blood pressure, heart disease, diminished immune system functioning, depression, anxiety, poorer cognitive functioning) [6]. Older adults with disabilities and those living in areas affected by deprivation are particularly at risk for emotional distress, poor quality of life and low wellbeing [4, 7]. The negative mental health and psychological wellbeing effects of the COVID-19 pandemic on older adults are well-evidenced in other countries [8-10].



1  
2  
3 Fear is potentially mediating the link between the COVID-19 pandemic and its mental health  
4 and psychological wellbeing effects. Fear is characterised by emotive avoidance in relation  
5 to the stimulus [11]. Fear of encountering individuals who are possibly COVID-19 positive  
6 has been reported [12]. Evidence further suggests that behavioural responses to COVID-19  
7 vary according to the level of COVID-19 fear [13]. A lower level of COVID-19 fear is  
8 associated with poor adherence to public health messages [13], while an excessive level is  
9 associated with misattributing symptoms of seasonal colds or flu as COVID-19 and poorer  
10 quality of life across physical and psychological health, social relationships and  
11 environmental domains [14].  
12  
13  
14  
15  
16  
17  
18  
19  
20  
21  
22  
23

24 COVID-19 fear might affect individuals and society in a myriad of ways including (1) social  
25 isolation due to reservations around meeting others or engaging in pre-COVID activities; (2)  
26 poorer health and well-being due to (i) reluctance to engage with health professionals for  
27 fear of contracting COVID-19, or (ii) over-zealous self-referral due to high health anxiety; (3)  
28 weakened economic stability due to changing consumption and work patterns. There is a  
29 knowledge gap in relating these behavioural responses to COVID-19 fear among older  
30 adults, who are arguably most vulnerable to poorer outcomes from COVID-19.  
31  
32  
33  
34  
35  
36  
37  
38  
39  
40

## 41 **RESEARCH AIMS**

42  
43  
44  
45 The overall aim is to explore how the spectrum of COVID-19 fear manifests in older adults  
46 (aged  $\geq 50$ ) living in Scotland and how it impacts their health, social and economic  
47 behaviours.  
48  
49  
50

## 51 **RESEARCH OBJECTIVES**

1. To develop a robust and evidence-based COVID-19 fear instrument to measure the prevalence of COVID-19 fear among older adults in Scotland
2. To examine the impact of COVID-19 fear on the willingness of older adults to re-engage across health, social, and economic domains as society adjusts to what may be termed the 'new normal' and inform policy and practice.

## MAIN RESEARCH QUESTIONS

1. What is the prevalence of COVID-19 fear among older adults living in Scotland?
2. How has COVID-19 fear impacted social connectedness?
3. How and to what extent did older adults' use of information and communications technology (ICT) change during the lockdown?
4. What are the health predictors of COVID-19 fear, and are these socially graded?
5. How is COVID-19 fear associated with known barriers and facilitators to health service engagement (e.g., GP and hospital visits, screening programmes attendance)?
6. Has COVID-19 fear changed views about how long people expect to live and, if so, how far has it changed saving and spending behaviours?
7. How has COVID-19 fear changed consumption behaviours (e.g., alcohol consumption, transport use, attendance at live events, dining-out, television viewing)?
8. How has COVID-19 fear affected views on workplace preferences and working patterns?

The findings will provide a robust understanding of how older adults in Scotland have negotiated their response to different aspects of their life in the 'new normal'. These insights,

1  
2  
3 which are relevant to the UK as a whole, will inform policy and interventions on key social,  
4 health and economic issues pertinent to societal recovery from the COVID-19 pandemic.  
5  
6  
7  
8

## 9 **METHODS AND ANALYSIS**

### 10 **Study design**

11  
12  
13  
14  
15  
16 This is a convergent, mixed-methods study comprising three phases: Phase 1: development  
17 of validated COVID-19 fear scale (this phase was completed at the submission of this  
18 protocol for publication); Phase 2A: a large-scale survey using multimodal data collection;  
19 Phase 2B: individual and group interviews conducted by academic researchers and  
20 community-based co-researcher volunteers; Phase 3: co-production of findings with  
21 professionals working with older adults (e-Delphi exercise) to develop recommendations for  
22 policy and practice. A group of community-based co-researcher volunteers, sharing similar  
23 characteristics to our target population, has been guiding the development and  
24 implementation of these phases. Across the three phases, five work packages (WP) are  
25 developed, reflective of the multifaceted nature of the aims and objectives of this study. The  
26 focus of each WP is presented in Figure 1.  
27  
28  
29  
30  
31  
32  
33  
34  
35  
36  
37  
38  
39  
40

41 The quantitative strand of this work will promote the generalisability of findings in relation to  
42 the prevalence of COVID-19 fear among older adults and its impact on behavioural  
43 responses to the pandemic. The qualitative strand will help to develop a deep and rich  
44 understanding of older adults' COVID-19 fears and worries, and pandemic related  
45 experiences and behaviours. The consensus consultation with expert stakeholders will help  
46 to inform policy and practice, with a view to achieving impact for the study. The study dates  
47 are from December 2020 to November 2022.  
48  
49  
50  
51  
52  
53  
54  
55  
56  
57

58 <<Insert Figure 1 here>>  
59  
60

1  
2  
3  
4  
5 Phase 1: Development of a scale to measure the prevalence of COVID-19 fear  
6

7 *Initial item development*  
8

9 We decided to develop and validate a new scale because the existing tools measuring  
10 COVID-19 stress, anxiety and/or fear were limited in scope, e.g., were designed as clinical  
11 tools or focused on worries related to health and transmission. We required a scale that  
12 would measure a spectrum of fears and concerns in response to the pandemic more  
13 generally.  
14  
15  
16  
17  
18  
19  
20  
21

22 The initial development of the COVID-19 fear items was informed by a rapid review of  
23 scientific and grey literature. We searched databases available via EBSCOhost, Web of  
24 Science and ScienceDirect for English literature published since January 1991 and focus on  
25 (i) generic pandemic fear and health anxiety, and (ii) COVID-19 fear, stress or worry. After  
26 assessing results, we developed a protocol for a more focused rapid review [PROSPERO  
27 registration no: CRD42021250233]. To meet review inclusion criteria, items needed to report  
28 the development or validation of instruments intended for use with adults to assess (i) the  
29 presence of a psychological state characterised as 'fear', 'worry', 'concern', 'anxiety' or other  
30 broadly synonymous descriptors, (ii) the experience or measure of the psychological state  
31 which had been precipitated by awareness of or perceptions related to the COVID-19  
32 pandemic and assessed in general or specific situations or in relation to specified contexts.  
33 We excluded literature describing (i) the development or validation of instruments in people  
34 aged  $\leq 16$ ; (ii) not accessing the psychological states of interest; (iii) combining assessment  
35 or measurement of fear with assessment or quantification of other personal characteristics  
36 (e.g., personality traits, health conditions); and (iv) assessing psychological states prompted  
37 by any other events, infectious agents or diseases. The rapid literature review was  
38 supplemented with a review of existing longitudinal studies that had COVID-19 specific  
39 modules (e.g., COVIDLife, The Irish Longitudinal Study of Ageing, English Longitudinal  
40  
41  
42  
43  
44  
45  
46  
47  
48  
49  
50  
51  
52  
53  
54  
55  
56  
57  
58  
59  
60

1  
2  
3 Study of Ageing). Based on this and literature review findings, the research team developed  
4 potential dimensions and drafted 100 candidate items.  
5  
6  
7  
8

### 9 *Sampling, recruitment and consent*

10  
11 For the item reduction exercise, we recruited participants using Prolific.co [15], in two  
12 rounds. Prolific (formerly Prolific Academic) is an online platform on which academics post  
13 surveys for completion by a pool of participants. It has been demonstrated to produce high  
14 quality data. In round one, potential participants could see the survey advertised on Prolific if  
15 they were aged >18 with an IP address based within the UK. The study was advertised as a  
16 5 minute survey that asks “about your attitudes to and perceptions of life in the UK these  
17 days” and included a warning that “some of the questions ask about your experience of the  
18 Pandemic and your worries”. In round two, we used Prolific to filter potential respondents to  
19 those aged >40 with IP addresses based within the UK. The study was advertised as  
20 “academic research on attitudes, expectations, and perceptions about the COVID-19  
21 pandemic” and included a warning that the survey would cover “topics of illness and death”.  
22 In both rounds of data collection, potential participants were offered payment for taking part,  
23 at a rate of £7.50 per hour. Potential participants were invited to view further details on the  
24 survey front page, which elicited their informed consent.  
25  
26  
27  
28  
29  
30  
31  
32  
33  
34  
35  
36  
37  
38  
39  
40  
41  
42

### 43 *Data collection and analysis*

44  
45  
46  
47 Data for round one was collected between 12 and 15 March 2021. 262 respondents were  
48 recruited, of whom 241 completed all survey items. Explanatory factor analysis was  
49 conducted on the 100 candidate items using STATA v.15.1 [16]. Explanatory factor analysis  
50 and parallel analysis identified candidate factors. Promax rotation identified items uniquely  
51 loading on each factor. These analyses delivered seven factors. The items associated with  
52 these factors were then tested for clarity and precision by co-researchers in our study in  
53 Think Aloud sessions [17]. The Think Aloud process allows for respondents to complete the  
54  
55  
56  
57  
58  
59  
60

1  
2  
3 survey in the presence of a researcher and speak their thoughts as they formulate their  
4  
5 responses.  
6  
7  
8

9 After checking the item comprehensibility with the co-researchers, we tweaked the wording  
10 of some items. We then recruited an additional 527 respondents for the second round of  
11 factor analysis. Participants were recruited using Prolific.co [15] between 4 and 7 May 2021.  
12  
13 We split the sample such that data from 263 respondents were used in exploratory factor  
14 analysis and data from the remaining 264 were used in confirmatory factor analysis.  
15  
16 The resultant multidimensional scale - the Worries Emerging from the COVID-19 Pandemic  
17 (WECP) scale - captures the following dimensions: worries about the future course of the  
18 COVID-19 pandemic; worries about readjusting to society; feelings of isolation; worries  
19 about the continuation or reintroduction of restrictions; worries for family and friends;  
20 financial worries and worries regarding the safety and efficacy of COVID-19 vaccines. The  
21 WECP scale shows satisfactory internal consistency (as measured by Cronbach's alpha) as  
22 well as convergent and discriminant validity. The development, validation process and final  
23 scale are reported in the working paper by Comerford et al. (2022) [18].  
24  
25  
26  
27  
28  
29  
30  
31  
32  
33  
34  
35  
36  
37  
38

39 Phase 2A: A large-scale cross-sectional survey using multimodal data collection  
40  
41  
42

#### 43 *Sampling, recruitment and consent* 44 45 46 47

48 Eligible participants will be older adults aged  $\geq 50$  who live in Scotland at the time of data  
49 collection. The target sample will be derived from two existing Scottish longitudinal studies -  
50 Healthy Ageing In Scotland (HAGIS) and Generation Scotland (n=15,074 participants)  
51 comprises. With an estimated response rate of 25%, this sample will potentially provide  
52 >3,700 completed surveys. Response rates have varied over the period of the pandemic  
53 with some evidence of survey fatigue [19]. The respondents who previously consented to  
54 future re-contact will be approached for consent to take part in this study. The mode of  
55  
56  
57  
58  
59  
60

1  
2  
3 contact (online, postal and telephone) were based on prior expressed preference to support  
4 participation. Additionally, a predefined panel of 600 participants will be invited to take part  
5 in the online survey to address anticipated bias within the sample.  
6  
7  
8  
9

### 10 11 *Data collection and analysis* 12

13  
14  
15 Online mode: Eligible online participants will receive an electronic invitation letter with an  
16 enclosed link to the study website (www.hagis.scot) and a personalised link to the survey.  
17 The website will describe the study, how to take part in the survey and how to get more  
18 information (including an email and a Freephone number to connect directly to study staff).  
19 The online survey will take approximately 35-45 minutes to complete and will be hosted on  
20 the Qualtrics XM Platform [20]. Participants will receive a reminder following 2 weeks post-  
21 invitation.  
22  
23  
24  
25  
26  
27  
28  
29  
30

31  
32 Telephone mode: Participants for telephone interviews will be approached by DJS Research  
33 interviewers who will explain the study, how to get more information about the study and  
34 arrange a suitable time for the interview. The survey will take approximately 60-75 minutes  
35 to complete. Survey responses will be initially entered into the Telephone Assisted Personal  
36 Interview (TAPI) system and then transferred into the Qualtrics XM Platform [20].  
37  
38  
39  
40  
41  
42  
43  
44

45 Postal mode: All eligible postal participants will receive a postal invitation letter, information  
46 leaflet, paper-based survey and reply-paid envelope. The survey will take between 45-50  
47 minutes to complete. All postal participants will be offered the option to take part in the  
48 survey electronically, in what may be termed as a 'nudge to web' approach. The reminder  
49 postcards will be sent to participants 3 weeks post-invitation.  
50  
51  
52  
53  
54  
55

56  
57 Panel: DJS Research (social marketing agency appointed to support fieldwork activities) will  
58 recruit panellists to the study via an electronic invitation. The panellists who express interest  
59  
60

1  
2  
3 to participate will be directed to an online survey hosted by DJS Research using Nebu [21].  
4  
5 Panellists will be paid for completing the survey, at a rate of £12 per survey.  
6  
7  
8

9  
10 The survey will be largely based on the HAGIS survey [22] to include validated instruments  
11 for demographics, social circumstances, employment, physical health, mental health, health  
12 behaviour, social connectedness, and social participation. This will be further developed by  
13 drawing on the research team expertise, enhanced by relevant literature searches to include  
14 other instruments, e.g., vaccination status and attitudes. The WECF scale will be  
15 incorporated into the survey instrument. The survey instrument will be refined and pre-tested  
16 to ensure completion between 35-45 minutes, including the use of topic randomisation for  
17 the online mode. The survey was launched on 11 October 2021; survey fieldwork will be  
18 complete by end of January 2022.  
19  
20  
21  
22  
23  
24  
25  
26  
27  
28  
29

30  
31 Descriptive and inferential statistics will be generated using STATA v.15.1 [16]. Differences  
32 between sub-groups continuous variables will be assessed by one-way analysis of variance  
33 and for categorical variables by the chi-squared tests of independence. Correlates of  
34 COVID-19 fear and worries will be identified using univariate and multivariate regression  
35 analyses. Additional inferential statistical data analyses will depend on the specific research  
36 questions to be addressed in the health, social and economic work packages.  
37  
38  
39  
40  
41  
42  
43  
44

45 We should note that the survey sample has an inherent disadvantage of pre-existing  
46 sampling bias. We anticipate that there will be an over-representation of (i) older adults living  
47 in the East of Scotland, (ii) those aged 55-65, (iii) females, and (iv) those in the lower deciles  
48 of the income distribution. There will therefore likely be a concomitant under-representation  
49 of (i) older adults living in the South, West and North of Scotland, (ii) the youngest and oldest  
50 sections of the older adult population, (iii) males, and (iv) those at the lower ends of the  
51 income distribution. The sample weights should therefore will be estimated to align the  
52 survey participants as close as possible to the Registrar's General for Scotland's estimate of  
53  
54  
55  
56  
57  
58  
59  
60



1  
2  
3 the structure of the older adult population in 2021. The sample weights will be calculated  
4 based on gender, locational and age-related imbalances and not the income distribution.  
5  
6 Survey weights will be made available for analyses. Further, multimodal survey data  
7  
8 collection is likely to introduce selection bias which needs to be corrected by adjusting for  
9  
10 observable correlates of bias such as age, gender, and level of educational attainment.  
11  
12  
13  
14  
15

## 16 Phase 2B: Individual and group interviews

### 17 18 19 20 *Sampling, recruitment and consent*

21  
22  
23  
24 Semi-structured individual and small group interviews (2-3 participants) will be conducted  
25  
26 with 50 older adults (aged  $\geq 50$ ) who are currently living in Scotland and have the capacity to  
27  
28 consent to participate in the study. Allocation to different activities will be according to the  
29  
30 preference and availability of participants to support their engagement. Group interviews will  
31  
32 enable participants to share their experiences with others, generating depth around shared  
33  
34 experiences; individual interviews will enable a deeper exploration of individual experiences.  
35  
36 Recruitment will be targeted to ensure representation of participants with diverse  
37  
38 background characteristics - age category (50s, 60s, 70s,  $\geq 80$ s), geographical location (rural  
39  
40 and urban, across Scotland); gender, ethnicity, sexual orientation; and socio-economic  
41  
42 position. A one-page recruitment advertisement poster will be designed to facilitate  
43  
44 recruitment. The poster will be posted on the study's website and social media (Twitter,  
45  
46 Facebook, Instagram) and the University of Stirling's website. Participants will also be  
47  
48 recruited through the co-researchers' professional and social networks and the study  
49  
50 partners' networks.  
51  
52  
53  
54  
55  
56  
57  
58  
59  
60

1  
2  
3 An information sheet will be provided to the potential participants; written informed consent  
4 will be sought prior to the interview being conducted. If the consent form is not returned  
5 before the interview, the member of the team will obtain oral consent, which will be recorded.  
6  
7  
8  
9

### 10 11 *Data collection and analysis* 12 13

14  
15  
16 The semi-structured interviews and focus groups will be conducted collaboratively by a  
17 member of the research team and a co-researcher. The format will be relatively flexible, with  
18 the technical aspects (i.e., welcome and introduction, a brief presentation of the research,  
19 recording etc.) being covered by the member of the academic team and the questions being  
20 asked by a co-researcher. For each interview and focus group, the researchers will meet  
21 approximately 30 minutes prior to the participant joining to discuss how the interview and  
22 focus group should be conducted. After the interview or focus group has concluded, the  
23 researchers will conduct a debrief discussion.  
24  
25  
26  
27  
28  
29  
30  
31  
32  
33

34  
35 The interviews will take approximately an hour and focus groups around 1.5 hours. The  
36 participants will be asked whether they prefer to participate in an interview or a focus group.  
37  
38 The interviews will be conducted either online, using the platforms Microsoft Teams or  
39 Zoom, or face-to-face (subject to individual preference and COVID-19 regulations). All focus  
40 groups will be conducted online for safety reasons. The topic guide includes questions on  
41 COVID-19 fear and worries, social and intergenerational connectedness, use of ICT  
42 (frequency and purpose) during the pandemic and digital exclusion. Data collection started in  
43 November 2021; the data collection is ongoing and expected to conclude in Spring 2022.  
44  
45  
46  
47  
48  
49  
50  
51

52  
53 The data will be analysed in collaboration with the co-researchers using thematic analysis  
54 [23]. NVivo v.12 [24] will be used for deductive coding of data.  
55  
56  
57  
58  
59

60 Phase 3: Development of recommendations for policy and practice

### *Sampling, recruitment and consent*

An email-based e-Delphi consultation informed by Belton et al.'s (2019) [25] 'six-step prescription' will combine findings from qualitative and quantitative strands across multiple iterations of asynchronous consultation with a panel of 30 professionals working with older people across social, health, and economic contexts. Relevant organisations (service providers, charitable organisations) will be asked to suggest a potential expert panellist who may join the study. Potential panellists will be sent an information sheet containing details of what will be involved in an e-Delphi consultation and asked to provide written consent to participation before the consultation begins.

### *Data collection and development of recommendations*

Panellists will complete three rounds of an electronic survey. The first will explore panellists' perceptions of changes in older adults' engagement with social, health and economic activities during the pandemic and share their perceptions of the needs and priorities for impact (e.g., intervention and/or policy). The second survey will be informed by the summary analysis of the first survey, preliminary findings from preceding study fieldwork (Phase 2) and will re-explore the panel's recommendations and priorities. The third and final survey, accompanied by a summary analysis of the second, will explore the extent to which, and reasons why panellists prioritise their recommendations. The output of the e-Delphi exercise will produce a set of recommendations for action that incorporate the rationale and priorities based on professionals' experience and expertise.

Through this iterative approach, we will arrive at recommendations for practice and policy to ameliorate the impacts of COVID-19 fear. The recommendations will take into account the experiences of older adults as reflected in the qualitative and quantitative data from other

1  
2  
3 phases of the study and will be informed by expert panellists' real-world experience when  
4  
5 supporting older adults during the pandemic.  
6  
7

## 8 9 **PATIENT AND PUBLIC INVOLVEMENT**

10  
11  
12  
13 We have established a group of up to twelve older adults (aged  $\geq 50$ ) living in Scotland who  
14 acted as community-based co-researcher volunteers within the study. The primary aim of  
15 this group is to ensure that the voices of adults over 50 are appropriately represented in the  
16 study and for them to act as 'experts by experience' across all study phases and related  
17 activities. Their input will be key in ensuring that the study participants are provided with  
18 research documentation that enables them to make fully informed choices around  
19 participation and consent, and that study outputs are accessible to a wide range of  
20 professional and lay stakeholder groups. The co-researchers will meet monthly using an  
21 online platform and in-person when possible, taking into account the Scottish Government  
22 and University guidance. Co-researchers will be provided with equipment and training to  
23 support their engagement online as well as research training to enable qualitative data  
24 collection and analysis.  
25  
26  
27  
28  
29  
30  
31  
32  
33  
34  
35  
36  
37  
38  
39  
40

41 Co-researchers have been recruited through existing networks of the research team as well  
42 as announcements on social media. Members of the team have provided information and  
43 terms of reference for the group and asked to sign a volunteer agreement. The co-  
44 researchers will be actively engaged in the development of the COVID-19 fear scale and  
45 design of the survey questions; design of interview and focus groups topic guides; qualitative  
46 data collection; qualitative data analysis; interpretation of research findings; and  
47 communication of research outputs to a lay audience.  
48  
49  
50  
51  
52  
53  
54  
55  
56  
57

## 58 **ETHICS AND DISSEMINATION**

59  
60

1  
2  
3 We have a dedicated work package responsible for Ethics, Research Governance and Data  
4 Management (Figure 1). The study seeks to recruit participants of the HAGIS pilot study and  
5 extend the sample to Generation Scotland participants. Re-contacting these participants will  
6 require the processing of identifiable data, including contact details (postal address,  
7 telephone number, email). These data will be used for re-consent purposes and the  
8 provision of survey only. Returned survey questionnaires will utilise anonymised reference  
9 codes to protect the privacy and ensure anonymity. Data management will be guided by  
10 ESRC Research Data Policy [26]. Key ethical considerations will be (1) data security and  
11 anonymity; and (2) potential sensitivity of COVID-19 fear topic to the older age group. The  
12 research team is experienced in the handling of sensitive data and knowledgeable of  
13 protocols, best practices, and ethical and legal requirements for processing this type of data.  
14 We will ensure the adherence and compliance of the research team to standard protocols  
15 and practise (i.e., Data Process Impact Assessment, Data Sharing Agreements, the UK  
16 General Data Protection Regulation (UK GDPR)). All researchers involved in data collection  
17 will complete the MRC Research, UK GDPR and Confidentiality training courses. We will  
18 anticipate and plan for a potential upset that may be caused by sensitive topics. All study  
19 participants will be provided with a study email and a Freephone number to contact the  
20 team. Direct contact details to the Principal Investigator will be made available to all those  
21 approached to take part in the study.

22  
23  
24  
25  
26  
27  
28  
29  
30  
31  
32  
33  
34  
35  
36  
37  
38  
39  
40  
41  
42  
43  
44  
45 Ethical approval has been obtained for the development of a validated COVID-19 Fear  
46 Scale, the establishment of the Older Persons Advisory Group (co-researchers), the survey  
47 development and fieldwork, conduct of interviews and focus groups from the General  
48 University Ethics Panel at the University of Stirling. To enable the rapid commencement of  
49 projects, the University of Stirling has brought in an expedited review of applications for  
50 ethics approval and priority response from legal, human resource and finance professional  
51 services. Data sharing with other parties will be subject to a Data Sharing Agreement, the  
52 use of strict security protocols, and ethical approval.

1  
2  
3 The survey will provide a rich data resource accessible for future scientific research.  
4  
5 Anonymised survey data will be deposited with the UK Data Service [27]. The data will be  
6  
7 accessible free of charge for non-commercial users. We will conform to the Data  
8  
9 Documentation Initiative standard, which is used by the UK Data Service. The link to  
10  
11 deposited data will be made available on the study website ([www.hagis.scot](http://www.hagis.scot)) and via the  
12  
13 Gateway to Global Aging [28] - a public platform developed to facilitate cross-national and  
14  
15 longitudinal analyses of studies focusing on ageing, health and retirement around the world.  
16  
17 Our study is included in the Gateway's digital library to facilitate national and international  
18  
19 research. Qualitative data will be deposited with the University of Stirling online digital  
20  
21 repository - DataSTORRE.  
22  
23  
24  
25

26 We will share the findings via the study's website, rapid reports, academic publications,  
27  
28 webinars, and presentations at national and international conferences. Rapid reports will  
29  
30 provide timely access to emerging findings and academic publications to address key  
31  
32 research questions. There is planned dissemination to Scottish and UK policymakers and  
33  
34 partners. An Expert Advisory Board will be established to provide opportunities for the study  
35  
36 to receive feedback and advice, and to consolidate relationships between the network of  
37  
38 interdisciplinary experts in ageing studies, gerontology, economics and public health to  
39  
40 support and sustain HAGIS in the longer term.  
41  
42  
43  
44  
45  
46  
47  
48  
49  
50  
51  
52  
53  
54  
55  
56  
57  
58  
59  
60

## Figure 1. Study phases linked to work packages

**Acknowledgments:** We are thankful to Olivia Olivarius and Cate Pemble for their support with the development of the Worries Emerging from the COVID-19 Pandemic (WECF) scale and the survey instrument. We are extremely grateful to our community-based co-researchers Roy Anderson, Elizabeth Chrystall, David Curry, Margot Fairclough, Christine Ritchie, Pat Scrutton and Ann Smith who have contributed extensively to the development of project materials and qualitative fieldwork.

**Competing interests** Authors declare no competing interests.

### Funding statement

This work was funded by the Economic and Social Research Council (ESRC) as part of the UK Research and Innovation (UKRI) rapid response to COVID-19. Grant number: ES/V01711X/1.

**Authors' contributions:** ED developed the research concept and design and gained funding. ED, SA, TB, DC, LMcG, LMcC, JH, DB, AD and CD contributed to the development of the first draft of the manuscript. SA revised and edited the subsequent manuscript drafts based on the comments from all the authors. All authors read and approved the final manuscript.

## References

1. World Health Organization (WHO). Coronavirus disease (COVID-19), 2020. Available: [https://www.who.int/health-topics/coronavirus#tab=tab\\_1](https://www.who.int/health-topics/coronavirus#tab=tab_1) [Accessed 18 November 2021].
2. World Health Organization (WHO). WHO Coronavirus (COVID-19) Dashboard, 2021. Available: <https://covid19.who.int> [Accessed 10 January 2022].
3. UK Government. GOV.UK Coronavirus (COVID-19) in the UK, 2021. Available: <https://coronavirus.data.gov.uk/details/deaths> [Accessed 18 November 2021].
4. Steptoe A, Di Gessa G. Mental health and social interactions of older people with physical disabilities in England during the COVID-19 pandemic: a longitudinal cohort study. *The Lancet Public Health*. 2021;6:e365-e373.
5. Groarke JM, Berry E, Graham-Wisener L, McKenna-Plumley PE, McGlinchey E, Armour C. Loneliness in the UK during the COVID-19 pandemic: Cross-sectional results from the COVID-19 Psychological Wellbeing Study. *PloS One* 2020;15:e0239698.
6. Nicholson NR. A review of social isolation: an important but underassessed condition in older adults. *The Journal of Primary Prevention* 2012;33:137-52.
7. Buffel T, Yarker S, Phillipson C, Lang L, Lewis C, Doran P, Goff M. Locked down by inequality: Older people and the COVID-19 pandemic. *Urban Studies* 2021;6:00420980211041018.



1  
2  
3 8. Asmundson GJ, Taylor S. How health anxiety influences responses to viral outbreaks like  
4 COVID-19: What all decision-makers, health authorities, and health care professionals need  
5 to know. *Journal of Anxiety Disorders* 2020;71:102211.  
6  
7  
8

9  
10  
11 9. Galea S, Merchant RM, Lurie N. The mental health consequences of COVID-19 and  
12 physical distancing: the need for prevention and early intervention. *JAMA Internal Medicine*  
13 2020;180:817-8.  
14  
15  
16

17  
18  
19  
20 10. Kola L, Kohrt BA, Hanlon C, Naslund JA, Sikander S, Balaji M, Benjet C, Cheung EY,  
21 Eaton J, Gonsalves P, Hailemariam M. COVID-19 mental health impact and responses in  
22 low-income and middle-income countries: reimagining global mental health. *The Lancet*  
23 *Psychiatry* 2021;8:535-550.  
24  
25  
26  
27

28  
29  
30 11. Perin C, Beghi M, Cerri CG, Peroni F, Viganò B, Cornaggia CM. Experience of group  
31 conversations in rehabilitation medicine: methodological approach and pilot study. *Journal of*  
32 *Medicine and the Person* 2015;13:96-104.  
33  
34  
35  
36

37  
38  
39 12. Lin CY. Social reaction toward the 2019 novel coronavirus (COVID-19). *Social Health*  
40 *and Behavior* 2020;3:1.  
41  
42  
43  
44

45  
46 13. Harper CA, Satchell LP, Fido D, Litzman RD. Functional fear predicts public health  
47 compliance in the COVID-19 pandemic. *International Journal of Mental Health and Addiction*  
48 2020;19:1875-1888.  
49  
50  
51

52  
53 14. Choi EP, Hui BP, Wan EY, Kwok JY, Tam TH, Wu C. Covid-19 and health-related quality  
54 of life: A community-based online survey in Hong Kong. *International Journal of*  
55 *Environmental Research and Public Health* 2021;18:3228.  
56  
57  
58  
59  
60

- 1  
2  
3 15. Prolific. Prolific 2021: London, UK. Available: <https://www.prolific.co>  
4  
5  
6  
7 16. StataCorp. Stata Statistical Software: Release 15, 2017. College Station, TX: StataCorp  
8 LP.  
9  
10  
11  
12  
13 17. Eccles DW, Aarsal G. The think aloud method: what is it and how do I use it?. *Qualitative*  
14 *Research in Sport, Exercise and Health* 2017;9:514-31.  
15  
16  
17  
18  
19 18. Comerford DA, Olivarius O, Bell DNF, Douglas, E. Validation of the Worries Emerging  
20 from the Covid-19 Pandemic (WECP) Scale. Working Paper. Available:  
21 [https://dspace.stir.ac.uk/retrieve/b1913912-a5d8-46c4-bf7e-](https://dspace.stir.ac.uk/retrieve/b1913912-a5d8-46c4-bf7e-534ce36993e0/ValidationofWorriesEmergingfromtheCovidPandemicScale.pdf)  
22 [534ce36993e0/ValidationofWorriesEmergingfromtheCovidPandemicScale.pdf](https://dspace.stir.ac.uk/retrieve/b1913912-a5d8-46c4-bf7e-534ce36993e0/ValidationofWorriesEmergingfromtheCovidPandemicScale.pdf)  
23  
24  
25  
26  
27  
28  
29  
30 19. Fawns-Ritchie C, Altschul DM, Campbell A et al. CovidLife: a resource to understand  
31 mental health, well-being and behaviour during the COVID-19 pandemic in the UK [version  
32 1; peer review: 1 approved]. *Wellcome Open Res* 2021,6:176. Available:  
33 <https://doi.org/10.12688/wellcomeopenres.16987.1>  
34  
35  
36  
37  
38  
39  
40 20. Qualtrics. Qualtrics, 2021: Provo, Utah, USA. Available: <https://www.qualtrics.com>  
41 [Accessed 1 March 2021].  
42  
43  
44  
45  
46  
47 21. Nebu. Nebu BV, 2022: The Netherlands. Available: <https://www.nebu.com>  
48  
49  
50  
51 22. Douglas E, Rutherford A, Bell D. Pilot study protocol to inform a future longitudinal study  
52 of ageing using linked administrative data: Healthy AGEing In Scotland (HAGIS). *BMJ Open*  
53 2018;8:e018802.  
54  
55  
56  
57  
58  
59  
60

- 1  
2  
3 23. Braun V, Clarke V. Using thematic analysis in psychology. *Qualitative Research in*  
4  
5 *Psychology* 2006;3:77-101.  
6  
7  
8  
9 24. QSR International. NVivo 12, 2018. Available: [https://www.qsrinternational.com/nvivo/](https://www.qsrinternational.com/nvivo/enabling-research/the-new-nvivo)  
10  
11 [enabling-research/](https://www.qsrinternational.com/nvivo/enabling-research/the-new-nvivo) the- new- nvivo  
12  
13  
14  
15 25. Belton I, MacDonald A, Wright G, Hamlin I. Improving the practical application of the  
16  
17 Delphi method in group-based judgment: A six-step prescription for a well-founded and  
18  
19 defensible process. *Technological Forecasting and Social Change* 2019;147:72-82.  
20  
21  
22  
23 26. Economic and Social Research Council (ESRC). ESRC Research Data Policy, 2021.  
24  
25 Available: <https://www.ukri.org/publications/esrc-research-data-policy/> [Accessed 20  
26  
27 December 2019].  
28  
29  
30  
31  
32 27. UK Data Service. Deposit data, 2021. Available: [https://ukdataservice.ac.uk/help/deposit-](https://ukdataservice.ac.uk/help/deposit-data/deposit-in-the-curated-data-repository/)  
33  
34 [data/deposit-in-the-curated-data-repository/](https://ukdataservice.ac.uk/help/deposit-data/deposit-in-the-curated-data-repository/) [Accessed 13 January 2021].  
35  
36  
37  
38  
39 28. Gateway to Global Aging. Gateway to Global Aging Data, 2015. Available:  
40  
41 <https://g2aging.org> [Accessed 13 January 2021].  
42  
43  
44  
45  
46  
47  
48  
49  
50  
51  
52  
53  
54  
55  
56  
57  
58  
59  
60

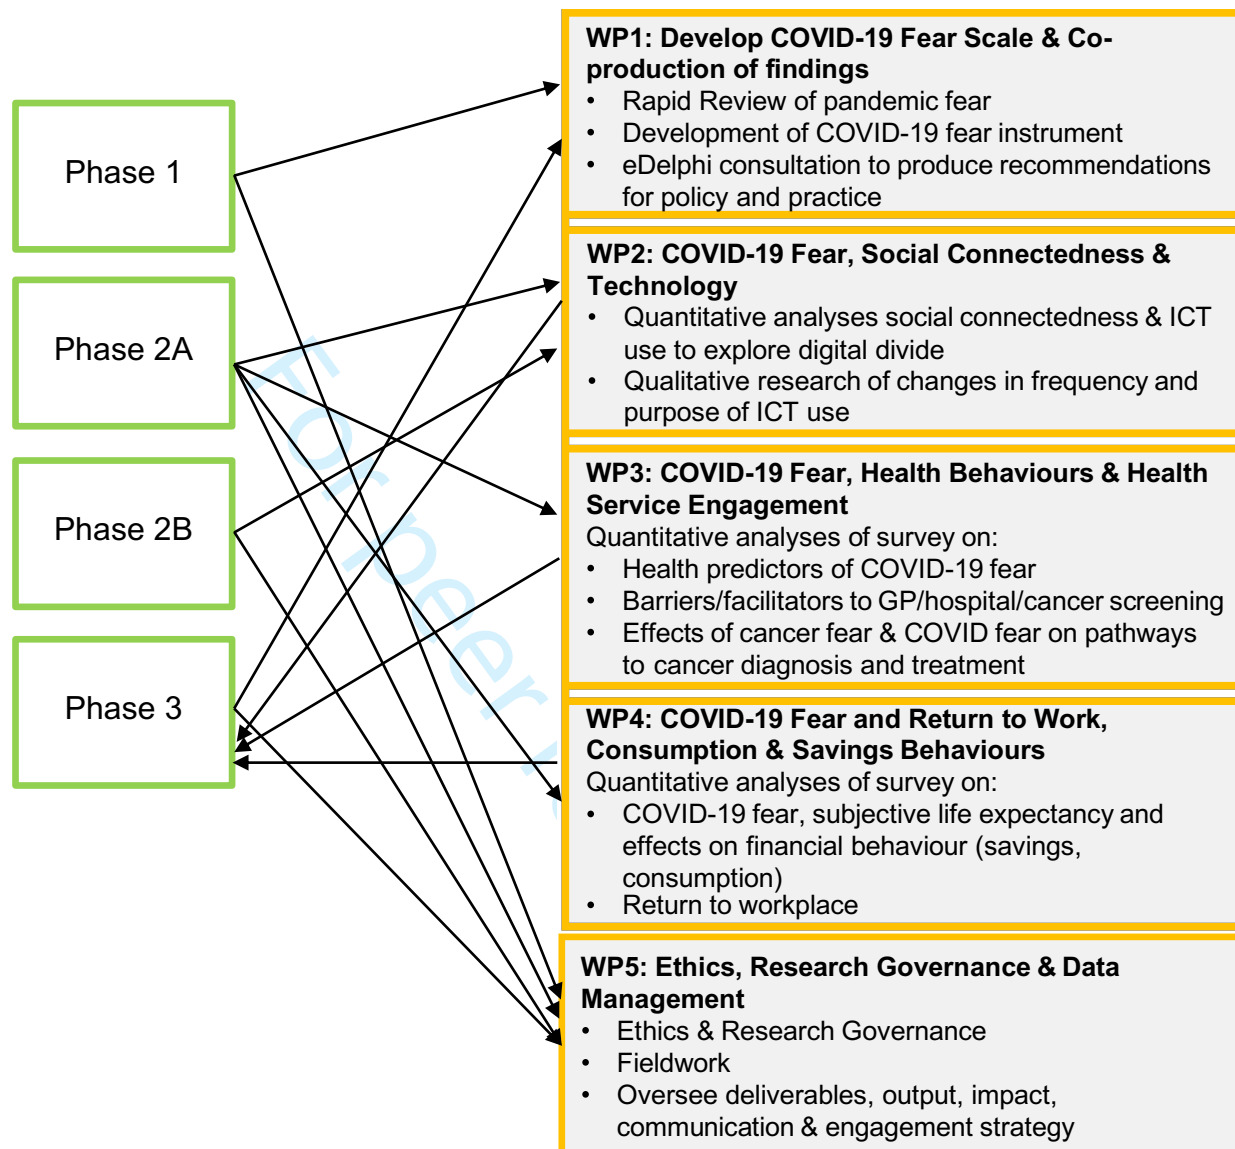

# BMJ Open

## The social, health and economic impact of COVID-19 – Healthy Ageing In Scotland (HAGIS): a protocol for a mixed- methods study

|                                 |                                                                                                                                                                                                                                                                                                                                                                                                                                                                                                                                                                                                                                                                                                                                                                                                                                                                                                                                                                                                                                                                                                                                         |
|---------------------------------|-----------------------------------------------------------------------------------------------------------------------------------------------------------------------------------------------------------------------------------------------------------------------------------------------------------------------------------------------------------------------------------------------------------------------------------------------------------------------------------------------------------------------------------------------------------------------------------------------------------------------------------------------------------------------------------------------------------------------------------------------------------------------------------------------------------------------------------------------------------------------------------------------------------------------------------------------------------------------------------------------------------------------------------------------------------------------------------------------------------------------------------------|
| Journal:                        | <i>BMJ Open</i>                                                                                                                                                                                                                                                                                                                                                                                                                                                                                                                                                                                                                                                                                                                                                                                                                                                                                                                                                                                                                                                                                                                         |
| Manuscript ID                   | bmjopen-2022-061427.R2                                                                                                                                                                                                                                                                                                                                                                                                                                                                                                                                                                                                                                                                                                                                                                                                                                                                                                                                                                                                                                                                                                                  |
| Article Type:                   | Protocol                                                                                                                                                                                                                                                                                                                                                                                                                                                                                                                                                                                                                                                                                                                                                                                                                                                                                                                                                                                                                                                                                                                                |
| Date Submitted by the Author:   | 15-Dec-2022                                                                                                                                                                                                                                                                                                                                                                                                                                                                                                                                                                                                                                                                                                                                                                                                                                                                                                                                                                                                                                                                                                                             |
| Complete List of Authors:       | Arakelyan, Stella; University of Stirling, Centre for Environment, Dementia and Ageing Research (CEDAR), Faculty of Social Sciences<br>Brown, Tamara; University of Stirling, Centre for Environment, Dementia and Ageing Research (CEDAR), Faculty of Social Sciences<br>McCabe, Louise; University of Stirling, Centre for Environment, Dementia and Ageing Research (CEDAR), Faculty of Social Sciences<br>McGregor, Lesley ; University of Stirling, Division of Psychology, Faculty of Natural Sciences<br>Comerford, David; University of Stirling, Stirling Management School<br>Dawson, Alison; University of Stirling, Centre for Environment, Dementia and Ageing Research (CEDAR), Faculty of Social Sciences<br>Bell, David; University of Stirling, Division of Economics<br>Douglas, Cristina; University of Stirling, Centre for Environment, Dementia and Ageing Research (CEDAR), Faculty of Social Sciences<br>Houston, John; University of Stirling, Stirling Management School<br>Douglas, Elaine; University of Stirling, Centre for Environment, Dementia and Ageing Research (CEDAR), Faculty of Social Sciences |
| <b>Primary Subject Heading</b>: | Public health                                                                                                                                                                                                                                                                                                                                                                                                                                                                                                                                                                                                                                                                                                                                                                                                                                                                                                                                                                                                                                                                                                                           |
| Secondary Subject Heading:      | Mental health                                                                                                                                                                                                                                                                                                                                                                                                                                                                                                                                                                                                                                                                                                                                                                                                                                                                                                                                                                                                                                                                                                                           |
| Keywords:                       | COVID-19, PUBLIC HEALTH, MENTAL HEALTH                                                                                                                                                                                                                                                                                                                                                                                                                                                                                                                                                                                                                                                                                                                                                                                                                                                                                                                                                                                                                                                                                                  |
|                                 |                                                                                                                                                                                                                                                                                                                                                                                                                                                                                                                                                                                                                                                                                                                                                                                                                                                                                                                                                                                                                                                                                                                                         |

SCHOLARONE™  
Manuscripts

1  
2  
3 **Title:** The social, health and economic impact of COVID-19 – Healthy Ageing In Scotland  
4  
5 (HAGIS): a protocol for a mixed-methods study  
6  
7  
8

9 **Authors:** Stella Arakelyan<sup>1</sup>, Tamara Brown<sup>1</sup>, Louise McCabe<sup>1</sup>, Lesley McGregor<sup>2</sup>, David  
10  
11 Comerford<sup>3</sup>, Alison Dawson<sup>1</sup>, David Bell<sup>3</sup>, Cristina Douglas<sup>1</sup>, John Houston<sup>3</sup>, Elaine Douglas<sup>1</sup>  
12  
13  
14

15  
16 <sup>1</sup>Centre for Environment, Dementia and Ageing Research (CEDAR), Faculty of Social  
17  
18 Sciences, University of Stirling, Stirling, FK9 4LA, Scotland, United Kingdom.  
19  
20

21 <sup>2</sup>Division of Psychology, Faculty of Natural Sciences, University of Stirling, Stirling, FK9 4LA,  
22  
23 Scotland, United Kingdom  
24  
25

26 <sup>3</sup>Stirling Management School, University of Stirling, Stirling, FK9 4LA, Scotland, United  
27  
28 Kingdom.  
29  
30

31  
32  
33 **\*Corresponding author:** Dr Elaine Douglas; Email: [elaine.douglas@stir.ac.uk](mailto:elaine.douglas@stir.ac.uk); Centre for  
34  
35 Environment, Dementia and Ageing Research (CEDAR), Faculty of Social Sciences;  
36  
37 University of Stirling, Stirling, FK9 4LA, Scotland, United Kingdom.  
38  
39  
40

41  
42  
43 **Word count: 4187**  
44  
45  
46  
47  
48  
49  
50  
51  
52  
53  
54  
55  
56  
57  
58  
59  
60

## ABSTRACT

### Introduction

Public health responses to the coronavirus (COVID-19) pandemic have reaped adverse physical, psychological, social and economic effects, with older adults disproportionately affected. Psychological consequences of the pandemic include fear, worry and anxiety. COVID-19 fear may impact individuals' mitigation behaviours, influencing their willingness to (re)engage in health, social and economic behaviours. This study seeks (1) to develop a robust and evidence-based questionnaire to measure the prevalence of COVID-19 fear among older adults (aged  $\geq 50$ ) in Scotland; (2) to examine the impact of COVID-19 fear on the willingness of older adults to (re)engage across health, social, and economic domains as society adjusts to the 'new normal' and inform policy and practice.

### Methods and analysis

This mixed-method study includes a large-scale multimodal survey, group and interviews with older adults (aged  $\geq 50$ ) living in Scotland, and an email-based 'e-Delphi' consultation with professionals working with older adults. The COVID-19 fear scale was developed and validated using exploratory and confirmatory factor analyses. Survey data will be analysed using descriptive and inferential statistics. Thematic analysis will be used to analyse qualitative data. Survey and qualitative findings will be triangulated and used as the starting point for an 'e-Delphi' consensus consultation with expert stakeholders.

### Ethics and dissemination

Ethical approval has been obtained from the University of Stirling for multimodal survey development, fieldwork methodology and data management. Anonymised survey data will be deposited with the UK Data Service, with a link provided via the Gateway to Global Aging. Qualitative data will be deposited with the University of Stirling online digital repository - DataSTORRE. A dedicated work package will oversee dissemination via a co-produced project website, conference presentations, rapid reports and national and international peer-

1  
2  
3 reviewed journal articles. There is planned engagement with Scottish and UK policymakers  
4  
5 to contribute to the UK Government's COVID-19 recovery strategy.  
6  
7  
8

9 **Keywords:** COVID-19, fear, older adults, health behaviour, social engagement, financial  
10  
11 behaviour, Scotland  
12  
13  
14  
15  
16  
17  
18  
19  
20  
21  
22  
23  
24  
25  
26  
27  
28  
29  
30  
31  
32  
33  
34  
35  
36  
37  
38  
39  
40  
41  
42  
43  
44  
45  
46  
47  
48  
49  
50  
51  
52  
53  
54  
55  
56  
57  
58  
59  
60

For peer review only



### Strengths and limitations of this study

- The survey sample will be based on existing participants of HAGIS and Generation Scotland which has the advantage of enabling analyses across time periods before and during the pandemic.
- The large-scale survey and qualitative findings will be triangulated to provide robust evidence on the COVID-19 health, social and economic effects on older adults.
- The survey sample has an inherent disadvantage of pre-existing sampling bias.
- Multimodal survey data collection is likely to introduce selection bias which needs to be corrected by adjusting for observable correlates of bias such as age, gender, and level of educational attainment.

## INTRODUCTION

The COVID-19 pandemic, caused by a novel SARS-CoV-2 coronavirus, has brought unprecedented disruption to our lives. Millions of people worldwide have been affected by the virus. Of these, older adults and those with underlying health conditions, have experienced disproportionately greater adverse effects [1]. At the time of writing, the number of confirmed COVID-19 cases has surpassed 305 million, and the number of deaths - 5.4 million [2]. In the UK, the rate of deaths among those aged  $\geq 60$  attributed to COVID-19 (i.e., COVID-19 on the death certificate) is considerably higher compared to younger age groups [3]. Similar trends are reported in other countries [2].

Early evidence suggesting that older adults are at higher risk of contracting COVID-19 and developing suboptimal outcomes has prompted stringent government regulations seeking to protect this population [1]. The UK Government issued guidance (e.g., stay-at-home orders, shielding, social distancing) to safeguard vulnerable people during the COVID-19 pandemic. These measures, although necessary and effective in minimising the spread of the virus, had adverse mental health effects on older adults [4]. The pandemic has exacerbated feelings of social isolation and loneliness among older adults in the UK, with approximately 1 in 2 people aged  $\geq 45$  reporting feelings of loneliness [5].

Increasing evidence demonstrates the detrimental impact of social isolation and loneliness on the physical health and wellbeing of the elderly (e.g., increased blood pressure, heart disease, diminished immune system functioning, depression, anxiety, poorer cognitive functioning) [6]. Older adults with disabilities and those living in areas affected by deprivation are particularly at risk for emotional distress, poor quality of life and low wellbeing [4, 7]. The negative mental health and psychological wellbeing effects of the COVID-19 pandemic on older adults are well-evidenced in other countries [8-10].

1  
2  
3 Fear is potentially mediating the link between the COVID-19 pandemic and its mental health  
4 and psychological wellbeing effects. Fear is characterised by emotive avoidance in relation  
5 to the stimulus [11]. Fear of encountering individuals who are possibly COVID-19 positive  
6 has been reported [12]. Evidence further suggests that behavioural responses to COVID-19  
7 vary according to the level of COVID-19 fear [13]. A lower level of COVID-19 fear is  
8 associated with poor adherence to public health messages [13], while an excessive level is  
9 associated with misattributing symptoms of seasonal colds or flu as COVID-19 and poorer  
10 quality of life across physical and psychological health, social relationships and  
11 environmental domains [14].  
12  
13  
14  
15  
16  
17  
18  
19  
20  
21  
22  
23

24 COVID-19 fear might affect individuals and society in a myriad of ways including (1) social  
25 isolation due to reservations around meeting others or engaging in pre-COVID activities; (2)  
26 poorer health and well-being due to (i) reluctance to engage with health professionals for  
27 fear of contracting COVID-19, or (ii) over-zealous self-referral due to high health anxiety; (3)  
28 weakened economic stability due to changing consumption and work patterns. There is a  
29 knowledge gap in relating these behavioural responses to COVID-19 fear among older  
30 adults, who are arguably most vulnerable to poorer outcomes from COVID-19.  
31  
32  
33  
34  
35  
36  
37  
38  
39  
40

## 41 **RESEARCH AIMS**

42  
43  
44

45 The overall aim is to explore how the spectrum of COVID-19 fear manifests in older adults  
46 (aged  $\geq 50$ ) living in Scotland and how it impacts their health, social and economic  
47 behaviours.  
48  
49  
50

## 51 **RESEARCH OBJECTIVES**

52  
53  
54  
55  
56  
57  
58  
59  
60

1. To develop a robust and evidence-based COVID-19 fear instrument to measure the prevalence of COVID-19 fear among older adults in Scotland
2. To examine the impact of COVID-19 fear on the willingness of older adults to re-engage across health, social, and economic domains as society adjusts to what may be termed the 'new normal' and inform policy and practice.

## MAIN RESEARCH QUESTIONS

1. What is the prevalence of COVID-19 fear among older adults living in Scotland?
2. How has COVID-19 fear impacted social connectedness?
3. How and to what extent did older adults' use of information and communications technology (ICT) change during the lockdown?
4. What are the health predictors of COVID-19 fear, and are these socially graded?
5. How is COVID-19 fear associated with known barriers and facilitators to health service engagement (e.g., GP and hospital visits, screening programmes attendance)?
6. Has COVID-19 fear changed views about how long people expect to live and, if so, how far has it changed saving and spending behaviours?
7. How has COVID-19 fear changed consumption behaviours (e.g., alcohol consumption, transport use, attendance at live events, dining-out, television viewing)?
8. How has COVID-19 fear affected views on workplace preferences and working patterns?

The findings will provide a robust understanding of how older adults in Scotland have negotiated their response to different aspects of their life in the 'new normal'. These insights,

1  
2  
3 which are relevant to the UK as a whole, will inform policy and interventions on key social,  
4 health and economic issues pertinent to societal recovery from the COVID-19 pandemic.  
5  
6  
7  
8

## 9 10 **METHODS AND ANALYSIS**

### 11 **Study design**

12  
13  
14  
15  
16 This is a convergent, mixed-methods study comprising three phases: Phase 1: development  
17 of validated COVID-19 fear scale (this phase was completed at the submission of this  
18 protocol for publication); Phase 2A: a large-scale survey using multimodal data collection;  
19 Phase 2B: individual and group interviews conducted by academic researchers and  
20 community-based co-researcher volunteers; Phase 3: co-production of findings with  
21 professionals working with older adults (e-Delphi exercise) to develop recommendations for  
22 policy and practice. A group of community-based co-researcher volunteers, sharing similar  
23 characteristics to our target population, has been guiding the development and  
24 implementation of these phases. Across the three phases, five work packages (WP) are  
25 developed, reflective of the multifaceted nature of the aims and objectives of this study. The  
26 focus of each WP is presented in Figure 1.  
27  
28  
29  
30  
31  
32  
33  
34  
35  
36  
37  
38  
39  
40

41 The quantitative strand of this work will promote the generalisability of findings in relation to  
42 the prevalence of COVID-19 fear among older adults and its impact on behavioural  
43 responses to the pandemic. The qualitative strand will help to develop a deep and rich  
44 understanding of older adults' COVID-19 fears and worries, and pandemic related  
45 experiences and behaviours. The consensus consultation with expert stakeholders will help  
46 to inform policy and practice, with a view to achieving impact for the study. The study dates  
47 are from December 2020 to November 2022.  
48  
49  
50  
51  
52  
53  
54  
55  
56  
57

58 <<Insert Figure 1 here>>  
59  
60

1  
2  
3  
4  
5 Phase 1: Development of a scale to measure the prevalence of COVID-19 fear  
6

7 *Initial item development*  
8

9 We decided to develop and validate a new scale because the existing tools measuring  
10 COVID-19 stress, anxiety and/or fear were limited in scope, e.g., were designed as clinical  
11 tools or focused on worries related to health and transmission. We required a scale that  
12 would measure a spectrum of fears and concerns in response to the pandemic more  
13 generally.  
14  
15  
16  
17  
18  
19  
20  
21

22 The initial development of the COVID-19 fear items was informed by a rapid review of  
23 scientific and grey literature. We searched databases available via EBSCOhost, Web of  
24 Science and ScienceDirect for English literature published since January 1991 and focus on  
25 (i) generic pandemic fear and health anxiety, and (ii) COVID-19 fear, stress or worry. After  
26 assessing results, we developed a protocol for a more focused rapid review [PROSPERO  
27 registration no: CRD42021250233]. To meet review inclusion criteria, items needed to report  
28 the development or validation of instruments intended for use with adults to assess (i) the  
29 presence of a psychological state characterised as 'fear', 'worry', 'concern', 'anxiety' or other  
30 broadly synonymous descriptors, (ii) the experience or measure of the psychological state  
31 which had been precipitated by awareness of or perceptions related to the COVID-19  
32 pandemic and assessed in general or specific situations or in relation to specified contexts.  
33 We excluded literature describing (i) the development or validation of instruments in people  
34 aged  $\leq 16$ ; (ii) not accessing the psychological states of interest; (iii) combining assessment  
35 or measurement of fear with assessment or quantification of other personal characteristics  
36 (e.g., personality traits, health conditions); and (iv) assessing psychological states prompted  
37 by any other events, infectious agents or diseases. The rapid literature review was  
38 supplemented with a review of existing longitudinal studies that had COVID-19 specific  
39 modules (e.g., COVIDLife, The Irish Longitudinal Study of Ageing, English Longitudinal  
40  
41  
42  
43  
44  
45  
46  
47  
48  
49  
50  
51  
52  
53  
54  
55  
56  
57  
58  
59  
60

1  
2  
3 Study of Ageing). Based on this and literature review findings, the research team developed  
4 potential dimensions and drafted 100 candidate items.  
5  
6  
7  
8

### 9 *Sampling, recruitment and consent*

10  
11 For the item reduction exercise, we recruited participants using Prolific.co [15], in two  
12 rounds. Prolific (formerly Prolific Academic) is an online platform on which academics post  
13 surveys for completion by a pool of participants. It has been demonstrated to produce high  
14 quality data. In round one, potential participants could see the survey advertised on Prolific if  
15 they were aged >18 with an IP address based within the UK. The study was advertised as a  
16 5 minute survey that asks “about your attitudes to and perceptions of life in the UK these  
17 days” and included a warning that “some of the questions ask about your experience of the  
18 Pandemic and your worries”. In round two, we used Prolific to filter potential respondents to  
19 those aged >40 with IP addresses based within the UK. The study was advertised as  
20 “academic research on attitudes, expectations, and perceptions about the COVID-19  
21 pandemic” and included a warning that the survey would cover “topics of illness and death”.  
22 In both rounds of data collection, potential participants were offered payment for taking part,  
23 at a rate of £7.50 per hour. Potential participants were invited to view further details on the  
24 survey front page, which elicited their informed consent.  
25  
26  
27  
28  
29  
30  
31  
32  
33  
34  
35  
36  
37  
38  
39  
40  
41  
42

### 43 *Data collection and analysis*

44  
45  
46  
47 Data for round one was collected between 12 and 15 March 2021. 262 respondents were  
48 recruited, of whom 241 completed all survey items. Explanatory factor analysis was  
49 conducted on the 100 candidate items using STATA v.15.1 [16]. Explanatory factor analysis  
50 and parallel analysis identified candidate factors. Promax rotation identified items uniquely  
51 loading on each factor. These analyses delivered seven factors. The items associated with  
52 these factors were then tested for clarity and precision by co-researchers in our study in  
53 Think Aloud sessions [17]. The Think Aloud process allows for respondents to complete the  
54  
55  
56  
57  
58  
59  
60

1  
2  
3 survey in the presence of a researcher and speak their thoughts as they formulate their  
4  
5 responses.  
6  
7  
8

9 After checking the item comprehensibility with the co-researchers, we tweaked the wording  
10 of some items. We then recruited an additional 527 respondents for the second round of  
11 factor analysis. Participants were recruited using Prolific.co [15] between 4 and 7 May 2021.  
12  
13 We split the sample such that data from 263 respondents were used in exploratory factor  
14 analysis and data from the remaining 264 were used in confirmatory factor analysis.  
15  
16 The resultant multidimensional scale - the Worries Emerging from the COVID-19 Pandemic  
17 (WECP) scale - captures the following dimensions: worries about the future course of the  
18 COVID-19 pandemic; worries about readjusting to society; feelings of isolation; worries  
19 about the continuation or reintroduction of restrictions; worries for family and friends;  
20 financial worries and worries regarding the safety and efficacy of COVID-19 vaccines. The  
21 WECP scale shows satisfactory internal consistency (as measured by Cronbach's alpha) as  
22 well as convergent and discriminant validity. The development, validation process and final  
23 scale are reported in the working paper by Comerford et al. (2022) [18].  
24  
25  
26  
27  
28  
29  
30  
31  
32  
33  
34  
35  
36  
37  
38

39 Phase 2A: A large-scale cross-sectional survey using multimodal data collection  
40  
41  
42

### 43 *Sampling, recruitment and consent* 44 45 46

47 Eligible participants will be older adults aged  $\geq 50$  who live in Scotland at the time of data  
48 collection. The target sample will be derived from two existing Scottish longitudinal studies -  
49 Healthy Ageing In Scotland (HAGIS) and Generation Scotland (n=15,074 participants)  
50 comprises. With an estimated response rate of 25%, this sample will potentially provide  
51 >3,700 completed surveys. Response rates have varied over the period of the pandemic  
52 with some evidence of survey fatigue [19]. The respondents who previously consented to  
53 future re-contact will be approached for consent to take part in this study. The mode of  
54  
55  
56  
57  
58  
59  
60



1  
2  
3 contact (online, postal and telephone) were based on prior expressed preference to support  
4 participation. Additionally, a predefined panel of 600 participants will be invited to take part  
5 in the online survey to address anticipated bias within the sample.  
6  
7  
8  
9

### 10 *Data collection and analysis*

11  
12  
13  
14  
15  
16 Online mode: Eligible online participants will receive an electronic invitation letter with an  
17 enclosed link to the study website ([www.hagis.scot](http://www.hagis.scot)) and a personalised link to the survey.  
18 The website will describe the study, how to take part in the survey and how to get more  
19 information (including an email and a Freephone number to connect directly to study staff).  
20 The online survey will take approximately 35-45 minutes to complete and will be hosted on  
21 the Qualtrics XM Platform [20]. Participants will receive a reminder following 2 weeks post-  
22 invitation.  
23  
24  
25  
26  
27  
28  
29  
30

31  
32 Telephone mode: Participants for telephone interviews will be approached by DJS Research  
33 interviewers who will explain the study, how to get more information about the study and  
34 arrange a suitable time for the interview. The survey will take approximately 60-75 minutes  
35 to complete. Survey responses will be initially entered into the Telephone Assisted Personal  
36 Interview (TAPI) system and then transferred into the Qualtrics XM Platform [20].  
37  
38  
39  
40  
41  
42  
43  
44

45 Postal mode: All eligible postal participants will receive a postal invitation letter, information  
46 leaflet, paper-based survey and reply-paid envelope. The survey will take between 45-50  
47 minutes to complete. All postal participants will be offered the option to take part in the  
48 survey electronically, in what may be termed as a 'nudge to web' approach. The reminder  
49 postcards will be sent to participants 3 weeks post-invitation.  
50  
51  
52  
53  
54  
55  
56  
57

58 Panel: DJS Research (social marketing agency appointed to support fieldwork activities) will  
59 recruit panellists to the study via an electronic invitation. The panellists who express interest  
60

1  
2  
3 to participate will be directed to an online survey hosted by DJS Research using Nebu [21].  
4  
5 Panellists will be paid for completing the survey, at a rate of £12 per survey.  
6  
7  
8

9 The survey will be largely based on the HAGIS survey [22] to include validated instruments  
10 for demographics, social circumstances, employment, physical health, mental health, health  
11 behaviour, social connectedness, and social participation. This will be further developed by  
12 drawing on the research team expertise, enhanced by relevant literature searches to include  
13 other instruments, e.g., vaccination status and attitudes. The WECF scale will be  
14 incorporated into the survey instrument. The survey instrument will be refined and pre-tested  
15 to ensure completion between 35-45 minutes, including the use of topic randomisation for  
16 the online mode. The survey was launched on 11 October 2021; survey fieldwork will be  
17 complete by end of January 2022.  
18  
19  
20  
21  
22  
23  
24  
25  
26  
27  
28  
29

30 Descriptive and inferential statistics will be generated using STATA v.15.1 [16]. Differences  
31 between sub-groups continuous variables will be assessed by one-way analysis of variance  
32 and for categorical variables by the chi-squared tests of independence. Correlates of  
33 COVID-19 fear and worries will be identified using univariate and multivariate regression  
34 analyses. Additional inferential statistical data analyses will depend on the specific research  
35 questions to be addressed in the health, social and economic work packages.  
36  
37  
38  
39  
40  
41  
42  
43  
44

45 We should note that the survey sample has an inherent disadvantage of pre-existing  
46 sampling bias. We anticipate that there will be an over-representation of (i) older adults living  
47 in the East of Scotland, (ii) those aged 55-65, (iii) females, and (iv) those in the lower deciles  
48 of the income distribution. There will therefore likely be a concomitant under-representation  
49 of (i) older adults living in the South, West and North of Scotland, (ii) the youngest and oldest  
50 sections of the older adult population, (iii) males, and (iv) those at the lower ends of the  
51 income distribution. The sample weights should therefore will be estimated to align the  
52 survey participants as close as possible to the Registrar's General for Scotland's estimate of  
53  
54  
55  
56  
57  
58  
59  
60

1  
2  
3 the structure of the older adult population in 2021. The sample weights will be calculated  
4 based on gender, locational and age-related imbalances and not the income distribution.  
5  
6 Survey weights will be made available for analyses. Further, multimodal survey data  
7  
8 collection is likely to introduce selection bias which needs to be corrected by adjusting for  
9  
10 observable correlates of bias such as age, gender, and level of educational attainment.  
11  
12  
13  
14  
15

## 16 Phase 2B: Individual and group interviews

### 17 18 19 20 *Sampling, recruitment and consent*

21  
22  
23  
24 Semi-structured individual and small group interviews (2-3 participants) will be conducted  
25  
26 with 50 older adults (aged  $\geq 50$ ) who are currently living in Scotland and have the capacity to  
27  
28 consent to participate in the study. Allocation to different activities will be according to the  
29  
30 preference and availability of participants to support their engagement. Group interviews will  
31  
32 enable participants to share their experiences with others, generating depth around shared  
33  
34 experiences; individual interviews will enable a deeper exploration of individual experiences.  
35  
36 Recruitment will be targeted to ensure representation of participants with diverse  
37  
38 background characteristics - age category (50s, 60s, 70s,  $\geq 80$ s), geographical location (rural  
39  
40 and urban, across Scotland); gender, ethnicity, sexual orientation; and socio-economic  
41  
42 position. A one-page recruitment advertisement poster will be designed to facilitate  
43  
44 recruitment. The poster will be posted on the study's website and social media (Twitter,  
45  
46 Facebook, Instagram) and the University of Stirling's website. Participants will also be  
47  
48 recruited through the co-researchers' professional and social networks and the study  
49  
50 partners' networks.  
51  
52  
53  
54  
55  
56  
57  
58  
59  
60

1  
2  
3 An information sheet will be provided to the potential participants; written informed consent  
4 will be sought prior to the interview being conducted. If the consent form is not returned  
5 before the interview, the member of the team will obtain oral consent, which will be recorded.  
6  
7  
8  
9

### 10 11 *Data collection and analysis* 12 13

14  
15  
16 The semi-structured interviews and focus groups will be conducted collaboratively by a  
17 member of the research team and a co-researcher. The format will be relatively flexible, with  
18 the technical aspects (i.e., welcome and introduction, a brief presentation of the research,  
19 recording etc.) being covered by the member of the academic team and the questions being  
20 asked by a co-researcher. For each interview and focus group, the researchers will meet  
21 approximately 30 minutes prior to the participant joining to discuss how the interview and  
22 focus group should be conducted. After the interview or focus group has concluded, the  
23 researchers will conduct a debrief discussion.  
24  
25  
26  
27  
28  
29  
30  
31  
32

33  
34  
35 The interviews will take approximately an hour and focus groups around 1.5 hours. The  
36 participants will be asked whether they prefer to participate in an interview or a focus group.  
37  
38 The interviews will be conducted either online, using the platforms Microsoft Teams or  
39 Zoom, or face-to-face (subject to individual preference and COVID-19 regulations). All focus  
40 groups will be conducted online for safety reasons. The topic guide includes questions on  
41 COVID-19 fear and worries, social and intergenerational connectedness, use of ICT  
42 (frequency and purpose) during the pandemic and digital exclusion. Data collection started in  
43 November 2021; the data collection is ongoing and expected to conclude in Spring 2022.  
44  
45  
46  
47  
48  
49  
50  
51

52  
53  
54 The data will be analysed in collaboration with the co-researchers using thematic analysis  
55 [23]. NVivo v.12 [24] will be used for deductive coding of data.  
56  
57  
58  
59

60 Phase 3: Development of recommendations for policy and practice

### *Sampling, recruitment and consent*

An email-based e-Delphi consultation informed by Belton et al.'s (2019) [25] 'six-step prescription' will combine findings from qualitative and quantitative strands across multiple iterations of asynchronous consultation with a panel of 30 professionals working with older adults across social, health, and economic contexts. Relevant organisations (service providers, charitable organisations) will be asked to suggest a potential expert panellist who may join the study. Potential panellists will be sent an information sheet containing details of what will be involved in an e-Delphi consultation and asked to provide written consent to participation before the consultation begins.

### *Data collection and development of recommendations*

Panellists will complete three rounds of an electronic survey. The first will explore panellists' perceptions of changes in older adults' engagement with social, health and economic activities during the pandemic and share their perceptions of the needs and priorities for impact (e.g., intervention and/or policy). The second survey will be informed by the summary analysis of the first survey, preliminary findings from preceding study fieldwork (Phase 2) and will re-explore the panel's recommendations and priorities. The third and final survey, accompanied by a summary analysis of the second, will explore the extent to which, and reasons why panellists prioritise their recommendations. The output of the e-Delphi exercise will produce a set of recommendations for action that incorporate the rationale and priorities based on professionals' experience and expertise.

Through this iterative approach, we will arrive at recommendations for practice and policy to ameliorate the impacts of COVID-19 fear. The recommendations will take into account the experiences of older adults as reflected in the qualitative and quantitative data from other

1  
2  
3 phases of the study and will be informed by expert panellists' real-world experience when  
4  
5 supporting older adults during the pandemic.  
6  
7

## 8 9 **PATIENT AND PUBLIC INVOLVEMENT**

10  
11  
12  
13 We have established a group of up to twelve older adults (aged  $\geq 50$ ) living in Scotland who  
14 acted as community-based co-researcher volunteers within the study. The primary aim of  
15 this group is to ensure that the voices of adults over 50 are appropriately represented in the  
16 study and for them to act as 'experts by experience' across all study phases and related  
17 activities. Their input will be key in ensuring that the study participants are provided with  
18 research documentation that enables them to make fully informed choices around  
19 participation and consent, and that study outputs are accessible to a wide range of  
20 professional and lay stakeholder groups. The co-researchers will meet monthly using an  
21 online platform and in-person when possible, taking into account the Scottish Government  
22 and University guidance. Co-researchers will be provided with equipment and training to  
23 support their engagement online as well as research training to enable qualitative data  
24 collection and analysis.  
25  
26  
27  
28  
29  
30  
31  
32  
33  
34  
35  
36  
37  
38  
39  
40

41 Co-researchers have been recruited through existing networks of the research team as well  
42 as announcements on social media. Members of the team have provided information and  
43 terms of reference for the group and asked to sign a volunteer agreement. The co-  
44 researchers will be actively engaged in the development of the COVID-19 fear scale and  
45 design of the survey questions; design of interview and focus groups topic guides; qualitative  
46 data collection; qualitative data analysis; interpretation of research findings; and  
47 communication of research outputs to a lay audience.  
48  
49  
50  
51  
52  
53  
54  
55  
56  
57

## 58 **ETHICS AND DISSEMINATION**

59  
60

1  
2  
3 We have a dedicated work package responsible for Ethics, Research Governance and Data  
4 Management (Figure 1). The study seeks to recruit participants of the HAGIS pilot study and  
5 extend the sample to Generation Scotland participants. Re-contacting these participants will  
6 require the processing of identifiable data, including contact details (postal address,  
7 telephone number, email). These data will be used for re-consent purposes and the  
8 provision of survey only. Returned survey questionnaires will utilise anonymised reference  
9 codes to protect the privacy and ensure anonymity. Data management will be guided by  
10 ESRC Research Data Policy [26]. Key ethical considerations will be (1) data security and  
11 anonymity; and (2) potential sensitivity of COVID-19 fear topic to the older age group. The  
12 research team is experienced in the handling of sensitive data and knowledgeable of  
13 protocols, best practices, and ethical and legal requirements for processing this type of data.  
14 We will ensure the adherence and compliance of the research team to standard protocols  
15 and practise (i.e., Data Process Impact Assessment, Data Sharing Agreements, the UK  
16 General Data Protection Regulation (UK GDPR)). All researchers involved in data collection  
17 will complete the MRC Research, UK GDPR and Confidentiality training courses. We will  
18 anticipate and plan for a potential upset that may be caused by sensitive topics. All study  
19 participants will be provided with a study email and a Freephone number to contact the  
20 team. Direct contact details to the Principal Investigator will be made available to all those  
21 approached to take part in the study.

22  
23  
24  
25  
26  
27  
28  
29  
30  
31  
32  
33  
34  
35  
36  
37  
38  
39  
40  
41  
42  
43  
44  
45 Ethical approval has been obtained for the development of a validated COVID-19 Fear  
46 Scale, the establishment of the Older Persons Advisory Group (co-researchers), the survey  
47 development and fieldwork, conduct of interviews and focus groups from the General  
48 University Ethics Panel at the University of Stirling. To enable the rapid commencement of  
49 projects, the University of Stirling has brought in an expedited review of applications for  
50 ethics approval and priority response from legal, human resource and finance professional  
51 services. Data sharing with other parties will be subject to a Data Sharing Agreement, the  
52 use of strict security protocols, and ethical approval.

1  
2  
3 The survey will provide a rich data resource accessible for future scientific research.  
4  
5 Anonymised survey data will be deposited with the UK Data Service [27]. The data will be  
6  
7 accessible free of charge for non-commercial users. We will conform to the Data  
8  
9 Documentation Initiative standard, which is used by the UK Data Service. The link to  
10  
11 deposited data will be made available on the study website ([www.hagis.scot](http://www.hagis.scot)) and via the  
12  
13 Gateway to Global Aging [28] - a public platform developed to facilitate cross-national and  
14  
15 longitudinal analyses of studies focusing on ageing, health and retirement around the world.  
16  
17 Our study is included in the Gateway's digital library to facilitate national and international  
18  
19 research. Qualitative data will be deposited with the University of Stirling online digital  
20  
21 repository - DataSTORRE.  
22  
23  
24  
25

26 We will share the findings via the study's website, rapid reports, academic publications,  
27  
28 webinars, and presentations at national and international conferences. Rapid reports will  
29  
30 provide timely access to emerging findings and academic publications to address key  
31  
32 research questions. There is planned dissemination to Scottish and UK policymakers and  
33  
34 partners. An Expert Advisory Board will be established to provide opportunities for the study  
35  
36 to receive feedback and advice, and to consolidate relationships between the network of  
37  
38 interdisciplinary experts in ageing studies, gerontology, economics and public health to  
39  
40 support and sustain HAGIS in the longer term.  
41  
42  
43  
44  
45  
46  
47  
48  
49  
50  
51  
52  
53  
54  
55  
56  
57  
58  
59  
60



## Figure 1. Study phases linked to work packages

**Acknowledgments:** We are thankful to Olivia Olivarius and Cate Pemble for their support with the development of the Worries Emerging from the COVID-19 Pandemic (WECF) scale and the survey instrument. We are extremely grateful to our community-based co-researchers Roy Anderson, Elizabeth Chrystall, David Curry, Margot Fairclough, Christine Ritchie, Pat Scrutton and Ann Smith who have contributed extensively to the development of project materials and qualitative fieldwork.

**Competing interests** Authors declare no competing interests.

### Funding statement

This work was funded by the Economic and Social Research Council (ESRC) as part of the UK Research and Innovation (UKRI) rapid response to COVID-19. Grant number: ES/V01711X/1.

**Authors' contributions:** ED developed the research concept and design and gained funding. ED, SA, TB, DC, LMcG, LMcC, JH, DB, AD and CD contributed to the development of the first draft of the manuscript. SA revised and edited the subsequent manuscript drafts based on the comments from all the authors. All authors read and approved the final manuscript.

## References

1. World Health Organization (WHO). Coronavirus disease (COVID-19), 2020. Available: [https://www.who.int/health-topics/coronavirus#tab=tab\\_1](https://www.who.int/health-topics/coronavirus#tab=tab_1) [Accessed 18 November 2021].
2. World Health Organization (WHO). WHO Coronavirus (COVID-19) Dashboard, 2021. Available: <https://covid19.who.int> [Accessed 10 January 2022].
3. UK Government. GOV.UK Coronavirus (COVID-19) in the UK, 2021. Available: <https://coronavirus.data.gov.uk/details/deaths> [Accessed 18 November 2021].
4. Steptoe A, Di Gessa G. Mental health and social interactions of older people with physical disabilities in England during the COVID-19 pandemic: a longitudinal cohort study. *The Lancet Public Health*. 2021;6:e365-e373.
5. Groarke JM, Berry E, Graham-Wisener L, McKenna-Plumley PE, McGlinchey E, Armour C. Loneliness in the UK during the COVID-19 pandemic: Cross-sectional results from the COVID-19 Psychological Wellbeing Study. *PloS One* 2020;15:e0239698.
6. Nicholson NR. A review of social isolation: an important but underassessed condition in older adults. *The Journal of Primary Prevention* 2012;33:137-52.
7. Buffel T, Yarker S, Phillipson C, Lang L, Lewis C, Doran P, Goff M. Locked down by inequality: Older people and the COVID-19 pandemic. *Urban Studies* 2021;6:00420980211041018.

1  
2  
3 8. Asmundson GJ, Taylor S. How health anxiety influences responses to viral outbreaks like  
4 COVID-19: What all decision-makers, health authorities, and health care professionals need  
5 to know. *Journal of Anxiety Disorders* 2020;71:102211.  
6  
7  
8

9  
10  
11 9. Galea S, Merchant RM, Lurie N. The mental health consequences of COVID-19 and  
12 physical distancing: the need for prevention and early intervention. *JAMA Internal Medicine*  
13 2020;180:817-8.  
14  
15  
16

17  
18  
19 10. Kola L, Kohrt BA, Hanlon C, Naslund JA, Sikander S, Balaji M, Benjet C, Cheung EY,  
20 Eaton J, Gonsalves P, Hailemariam M. COVID-19 mental health impact and responses in  
21 low-income and middle-income countries: reimagining global mental health. *The Lancet*  
22 *Psychiatry* 2021;8:535-550.  
23  
24  
25  
26  
27

28  
29  
30 11. Perin C, Beghi M, Cerri CG, Peroni F, Viganò B, Cornaggia CM. Experience of group  
31 conversations in rehabilitation medicine: methodological approach and pilot study. *Journal of*  
32 *Medicine and the Person* 2015;13:96-104.  
33  
34  
35  
36

37  
38  
39 12. Lin CY. Social reaction toward the 2019 novel coronavirus (COVID-19). *Social Health*  
40 *and Behavior* 2020;3:1.  
41  
42  
43

44  
45 13. Harper CA, Satchell LP, Fido D, Litzman RD. Functional fear predicts public health  
46 compliance in the COVID-19 pandemic. *International Journal of Mental Health and Addiction*  
47 2020;19:1875-1888.  
48  
49  
50

51  
52  
53 14. Choi EP, Hui BP, Wan EY, Kwok JY, Tam TH, Wu C. Covid-19 and health-related quality  
54 of life: A community-based online survey in Hong Kong. *International Journal of*  
55 *Environmental Research and Public Health* 2021;18:3228.  
56  
57  
58  
59  
60

- 1  
2  
3 15. Prolific. Prolific 2021: London, UK. Available: <https://www.prolific.co>  
4  
5  
6  
7 16. StataCorp. Stata Statistical Software: Release 15, 2017. College Station, TX: StataCorp  
8 LP.  
9  
10  
11  
12  
13 17. Eccles DW, Aarsal G. The think aloud method: what is it and how do I use it?. *Qualitative*  
14 *Research in Sport, Exercise and Health* 2017;9:514-31.  
15  
16  
17  
18  
19  
20 18. Comerford DA, Olivarius O, Bell DNF, Douglas, E. Validation of the Worries Emerging  
21 from the Covid-19 Pandemic (WECP) Scale. Working Paper. Available:  
22 [https://dspace.stir.ac.uk/retrieve/b1913912-a5d8-46c4-bf7e-](https://dspace.stir.ac.uk/retrieve/b1913912-a5d8-46c4-bf7e-534ce36993e0/ValidationofWorriesEmergingfromtheCovidPandemicScale.pdf)  
23 [534ce36993e0/ValidationofWorriesEmergingfromtheCovidPandemicScale.pdf](https://dspace.stir.ac.uk/retrieve/b1913912-a5d8-46c4-bf7e-534ce36993e0/ValidationofWorriesEmergingfromtheCovidPandemicScale.pdf)  
24  
25  
26  
27  
28  
29  
30 19. Fawns-Ritchie C, Altschul DM, Campbell A et al. CovidLife: a resource to understand  
31 mental health, well-being and behaviour during the COVID-19 pandemic in the UK.  
32 *Wellcome Open Res* 2021;6:176.  
33  
34  
35  
36  
37  
38  
39 20. Qualtrics. Qualtrics, 2021: Provo, Utah, USA. Available: <https://www.qualtrics.com>  
40 [Accessed 1 March 2021].  
41  
42  
43  
44  
45 21. Nebu. Nebu BV, 2022: The Netherlands. Available: <https://www.nebu.com>  
46  
47  
48  
49 22. Douglas E, Rutherford A, Bell D. Pilot study protocol to inform a future longitudinal study  
50 of ageing using linked administrative data: Healthy AGEing In Scotland (HAGIS). *BMJ Open*  
51 2018;8:e018802.  
52  
53  
54  
55  
56  
57 23. Braun V, Clarke V. Using thematic analysis in psychology. *Qualitative Research in*  
58 *Psychology* 2006;3:77-101.  
59  
60

1  
2  
3  
4  
5 24. QSR International. NVivo 12, 2018. Available: [https://www.qsrinternational.com/nvivo/](https://www.qsrinternational.com/nvivo/enabling-research/the-new-nvivo)  
6  
7 enabling- research/ the- new- nvivo  
8  
9

10  
11 25. Belton I, MacDonald A, Wright G, Hamlin I. Improving the practical application of the  
12  
13 Delphi method in group-based judgment: A six-step prescription for a well-founded and  
14  
15 defensible process. *Technological Forecasting and Social Change* 2019;147:72-82.  
16  
17  
18

19  
20 26. Economic and Social Research Council (ESRC). ESRC Research Data Policy, 2021.  
21  
22 Available: <https://www.ukri.org/publications/esrc-research-data-policy/> [Accessed 20  
23  
24 December 2019].  
25  
26

27  
28 27. UK Data Service. Deposit data, 2021. Available: [https://ukdataservice.ac.uk/help/deposit-](https://ukdataservice.ac.uk/help/deposit-data/deposit-in-the-curated-data-repository/)  
29  
30 [data/deposit-in-the-curated-data-repository/](https://ukdataservice.ac.uk/help/deposit-data/deposit-in-the-curated-data-repository/) [Accessed 13 January 2021].  
31  
32

33  
34 28. Gateway to Global Aging. Gateway to Global Aging Data, 2015. Available:  
35  
36 <https://g2aging.org> [Accessed 13 January 2021].  
37  
38  
39  
40  
41  
42  
43  
44  
45  
46  
47  
48  
49  
50  
51  
52  
53  
54  
55  
56  
57  
58  
59  
60



Supplement: bmjopen-2022-061427.draft_revisions.pdf [file bmjopen-2022-061427.draft_revisions.pdf]
